# 1 **AMLs harboring DNMT3A-destabilizing variants** 2 **show increased intratumor DNA methylation** 3 **heterogeneity at bivalent chromatin domains**

4  
5 **Dohoon Lee<sup>1,2</sup>, Bonil Koo<sup>3,4</sup>, Seok-Hyun Kim<sup>5</sup>, Jamin Byun<sup>5,6,7</sup>, Junshik Hong<sup>5,6,7</sup>,**  
6 **Dong-Yeop Shin<sup>5,6,7</sup>, Choong-Hyun Sun<sup>8</sup>, Ji-Joon Song<sup>9</sup>, Jaesung Kim<sup>9</sup>, Siddhartha**  
7 **Jaiswal<sup>10</sup>, Sung-Soo Yoon<sup>5,6,7,\*</sup>, Sun Kim<sup>3,11,12,13,†</sup>, Youngil Koh<sup>5,6,7,8,‡</sup>**

8 <sup>1</sup>Bioinformatics Institute, Seoul National University, Seoul, Republic of Korea

9 <sup>2</sup>BK21 FOUR Intelligence Computing, Seoul National University, Seoul, Republic of Korea

10 <sup>3</sup>Interdisciplinary Program in Bioinformatics, Seoul National University, Seoul, Republic of Korea

11 <sup>4</sup>AIGENDRUG Co., Ltd., Seoul, Republic of Korea

12 <sup>5</sup>Cancer Research Institute, Seoul National University, Seoul, Republic of Korea

13 <sup>6</sup>Department of Internal Medicine, Seoul National University Hospital, Seoul, Republic of Korea

14 <sup>7</sup>Center for Medical Innovation, Seoul National University Hospital, Seoul, Republic of Korea

15 <sup>8</sup>Genome Opinion Inc., Seoul, Republic of Korea

16 <sup>9</sup>Department of Biological Sciences, KI for BioCentury, Korea Advanced Institute of Science and Technology  
17 (KAIST), Daejeon, Korea

18 <sup>10</sup>Department of Pathology, Stanford University, CA, USA

19 <sup>11</sup>Interdisciplinary Program in Artificial Intelligence, Seoul National University, Seoul, Republic of Korea

20 <sup>12</sup>Department of Computer Science and Engineering, Seoul National University, Seoul, Republic of Korea

21 <sup>13</sup>MOGAM Institute for Biomedical Research, Yong-in, Republic of Korea

22  
23 \*Corresponding author: [ssysmc@snu.ac.kr](mailto:ssysmc@snu.ac.kr)

24 †Corresponding author: [sunkim.bioinfo@snu.ac.kr](mailto:sunkim.bioinfo@snu.ac.kr)

25 ‡Corresponding author: [go01@snu.ac.kr](mailto:go01@snu.ac.kr)

26

27 **ABSTRACT**

28 The mechanistic link between the complex mutational landscape of *de novo*  
29 methyltransferase *DNMT3A* and the pathology of acute myeloid leukemia (AML) has not  
30 been clearly elucidated so far. A recent discovery on the catalogue of *DNMT3A*-destabilizing  
31 mutations throughout the *DNMT3A* gene as well as the oligomerization-dependent catalytic  
32 property of *DNMT3A* prompted us to investigate the common effect of *DNMT3A*-destabilizing  
33 mutations (*DNMT3A*<sup>INS</sup>) on the genomewide methylation patterns of AML cells. In this study,  
34 we describe the characteristics of *DNMT3A*<sup>INS</sup> AML methylomes through the comprehensive  
35 computational analyses on three independent AML cohorts. As a result, we show that  
36 methylomes of *DNMT3A*<sup>INS</sup> AMLs are considerably different from those of *DNMT3A*<sup>R882</sup> AMLs  
37 in that they exhibit both locally disordered DNA methylation states and increased across-cell  
38 DNA methylation heterogeneity in bivalent chromatin domains. This increased epigenetic  
39 heterogeneity was functionally associated with heterogeneous expression of membrane-  
40 associated factors shaping stem cell niche, implying the diversification of the modes of  
41 leukemic stem cell-niche interactions. We also present that the level of methylation disorder  
42 at bivalent domains predicts the response of AML cells to hypomethylating agents through  
43 cell line- and patient-level analyses, which supports that the survival of AML cells depends  
44 on stochastic DNA methylations at bivalent domains. Altogether, our work provides a novel  
45 mechanistic model suggesting the genomic origin of the aberrant epigenomic heterogeneity  
46 in disease conditions.

## 47 Introduction

48 Recent sequencing efforts of acute myeloid leukemia (AML) genomes and exomes have identified *DNMT3A* as one of  
49 the most recurrently mutated epigenetic modifiers whose mutation is associated with adverse patient outcome<sup>1</sup>. *DNMT3A*  
50 encodes a *de novo* DNA methyltransferase that establishes DNA methylation patterns during the development of  
51 mammalian stem cells<sup>2</sup>, but the precise molecular mechanism underlying the initiation and progression of AML mediated  
52 by mutant DNMT3A has not been clearly elucidated. One of the characteristics that obscures the identification of the  
53 mechanistic role of mutant DNMT3A in AML is its intricate mutational landscape. In AML, about 60% of the *DNMT3A*  
54 mutations cause amino acid substitution of arginine at position 882 (R882) and the remaining ~40% of mutations are  
55 seemingly dispersed throughout the functional domains of *DNMT3A*<sup>3</sup>. Thus, much attention so far has been primarily drawn  
56 on the significance of *DNMT3A* R882 mutations in AML due to their prevalence. The results of such studies are gradually  
57 reaching at the consensus that mutant DNMT3A<sup>R882</sup> elicits dominant negative effect by hampering wildtype DNMT3A  
58 from forming catalytically active homotetramers<sup>4</sup>, in spite of some opposing results<sup>5</sup>. On the contrary, for *DNMT3A*  
59 mutations other than the R882 mutation (non-R882 mutations), much of their clinical implication and mechanistic role in  
60 AML pathogenesis still remain to be elucidated. Recently, a comprehensive biochemical characterization of 253 variants  
61 across *DNMT3A* gene suggested that a considerable number of disease-associated *DNMT3A* variants trigger the  
62 destabilization of the protein followed by its proteasomal degradation<sup>6</sup>. Intriguingly, these variants inducing the instability  
63 of DNMT3A (*DNMT3A*<sup>INS</sup>), and perhaps reduced intracellular concentration of intact DNMT3A, seemed to confer high  
64 fitness advantages to the cells of hematopoietic lineage, but the underlying molecular mechanism linking *DNMT3A*<sup>INS</sup> and  
65 the progression of hematological disorders has not been clarified thoroughly.

66 Meanwhile, the epigenetic diversity of cancer cells, primarily in terms of the heterogeneity of DNA methylation patterns,  
67 is increasingly acknowledged as an important factor that contributes to the increased adaptive potential of the tumor, which  
68 leads to adverse outcome, treatment resistance, or shorter interval to relapse rate in a variety of cancer types<sup>7,8,9</sup>. In chronic  
69 lymphocytic leukemia, it has been reported that locally disordered methylation patterns at promoter regions are associated  
70 with increased transcriptional variability as well as adverse patient outcomes<sup>7</sup>, and its implication for the treatment  
71 resistance and disease relapse has been reported in diffuse large B-cell lymphoma<sup>10</sup>. The role of DNA methylation  
72 heterogeneity in AML has also been studied recently<sup>11</sup>. Given these broad clinical implications of DNA methylation  
73 heterogeneity, it has been widely accepted that the increased fitness of cancer cell population conferred by the epigenetic  
74 diversity is pivotal. However, the connection between a specific subset of DNMT3A variants and the extent of disorder of  
75 DNA methylation patterns have not been characterized so far.

76 Here, we provide a molecular-level insight into the fitness advantages conferred by *DNMT3A*<sup>INS</sup> variants through the  
77 investigation of their overall impact on the DNA methylomes and transcriptomes of AML patients. Particularly, we explore  
78 the association between *DNMT3A*<sup>INS</sup> and the disorderedness of DNA methylation patterns, in addition to the DNA  
79 methylation features that are routinely analyzed, such as promoter methylation levels or differentially methylated regions  
80 (DMRs). For the direct and robust examination of the methylomes of AML patients with *DNMT3A*<sup>INS</sup>, we extensively  
81 reanalyzed publicly available methylation profiles of AML patients from the two large independent cohorts<sup>8, 12</sup>.  
82 Furthermore, we performed reduced-representation bisulfite sequencing (RRBS) on our own cohort for validation. Through  
83 these analyses on diverse cohorts, we show *DNMT3A*<sup>INS</sup> AMLs exhibit increased local DNA methylation disorder as well  
84 as epigenetic cellular diversity that are associated with the transcriptional heterogeneity of genes having roles in  
85 determining the leukemic stem cell niche. Given the previous studies showing the oligomerization-dependent shift of  
86 catalytic processivity of DNMT3A and the concentration-dependent oligomerization preference of DNMT3A, this study

87 suggests an interesting model of pathogenesis having *DNMT3A*<sup>INS</sup> variants as the genetic origin of epigenetic instability.

## 88 Results

### 89 Definition of *DNMT3A*<sup>INS</sup> variants

90 To obtain a predefined set of *DNMT3A*<sup>INS</sup> variants, we utilized previous experimental results of the protein stability assay  
91 measuring the stability scores of mutant DNMT3A protein in terms of the stability ratio normalized to WT DNMT3A<sup>6</sup>.  
92 From the stability ratios for 253 disease-associated variants affecting 248 unique amino acid residues, we could obtain  
93 stability scores for each of the 248 residues by assigning average stability ratios for all substitutions associated with that  
94 residue. Since the resulting stability scores displayed a bimodal distribution, we could naturally divide them into two groups,  
95 namely destabilizing (n=125) and non-destabilizing (n=123) residues, based on the score 0.75 (Figure 1a, Supplementary  
96 Table 1). To further justify this grouping, we investigated the full-length structure of DNMT3A (obtained from AlphaFold  
97 Protein Structure Database<sup>13</sup>, Uniprot ID Q9Y6K1) and found that destabilizing residues are enriched in  $\beta$ -sheets behind  
98 the helical tetramer interface compared to non-destabilizing residues (Supplementary Figure 1a-d). Furthermore,  
99 destabilizing residues showed higher predicted local distance difference test (pLDDT) values, which generally represent  
100 greater evolutionary conservation and structural importance of the residues (Supplementary Figure 1e). Given these  
101 biochemical, structural and evolutionary grounds, we defined a *DNMT3A*<sup>INS</sup> variant as a point mutation occurring at  
102 destabilizing residues as well as nonsense and frameshift mutations occurring at any position of the protein to cover a  
103 broader spectrum of instability-inducing variants. Meanwhile, point mutations occurring at non-destabilizing positions  
104 other than R882 were defined as *DNMT3A*<sup>Other</sup> variants.

### 105 *DNMT3A*<sup>INS</sup> AMLs show locally disordered DNA methylation patterns

106 DNMT3A exerts its catalytic activity by forming oligomers. Intriguingly, the mechanism of DNMT3A-mediated *de*  
107 *novo* methylation is shown to be dependent on its oligomeric state<sup>14</sup>. A homotetrameric complex exhibits processive  
108 catalysis in which the addition of methyl group occurs consecutively on CpGs within a local stretch of DNA, whereas a  
109 dimeric complex shows distributive catalysis in which the complex rapidly dissociates from the DNA after a catalysis.  
110 Since the oligomeric state of DNMT3A was shown to be dependent<sup>15</sup> on the intracellular concentration of the protein<sup>15</sup>, we  
111 hypothesized that the distributive *de novo* methylation mediated by dimeric DNMT3A will be prevalent in *DNMT3A*<sup>INS</sup>  
112 AMLs. To quantify the extent of the processive or distributive *de novo* methylation from the traces left on the methylomes  
113 of AML patients, we utilized a computational measure called local pairwise methylation discordance<sup>16</sup> (LPMD; Figure 1b).  
114 LPMD is a per-sample measure that represents the extent to which a pair of nearby CpGs have different methylation states.  
115 Since the processive methylation will make a pair of CpG sites at a close distance both methylated, LPMD in turn reflects  
116 the processivity of *DNMT3A*, even though we cannot simply rule out the effects of other factors including TET-driven  
117 demethylation.

118 We conducted a reanalysis of the enhanced reduced-representation bisulfite sequencing (eRRBS) data provided by Li  
119 et al.<sup>8</sup> (hereafter called Li2016 cohort) for 94 paired diagnosis and relapse samples from 47 AML patients. We first  
120 identified somatic mutations for all the 94 AML samples and compared their LPMDs altogether according to their *DNMT3A*  
121 mutation states. As expected, LPMD steadily increased as the distance between CpG pairs increased, reflecting the local  
122 homogeneity of DNA methylation states (Figure 1c). Surprisingly, we observed that *DNMT3A*<sup>INS</sup> AMLs showed  
123 significantly higher

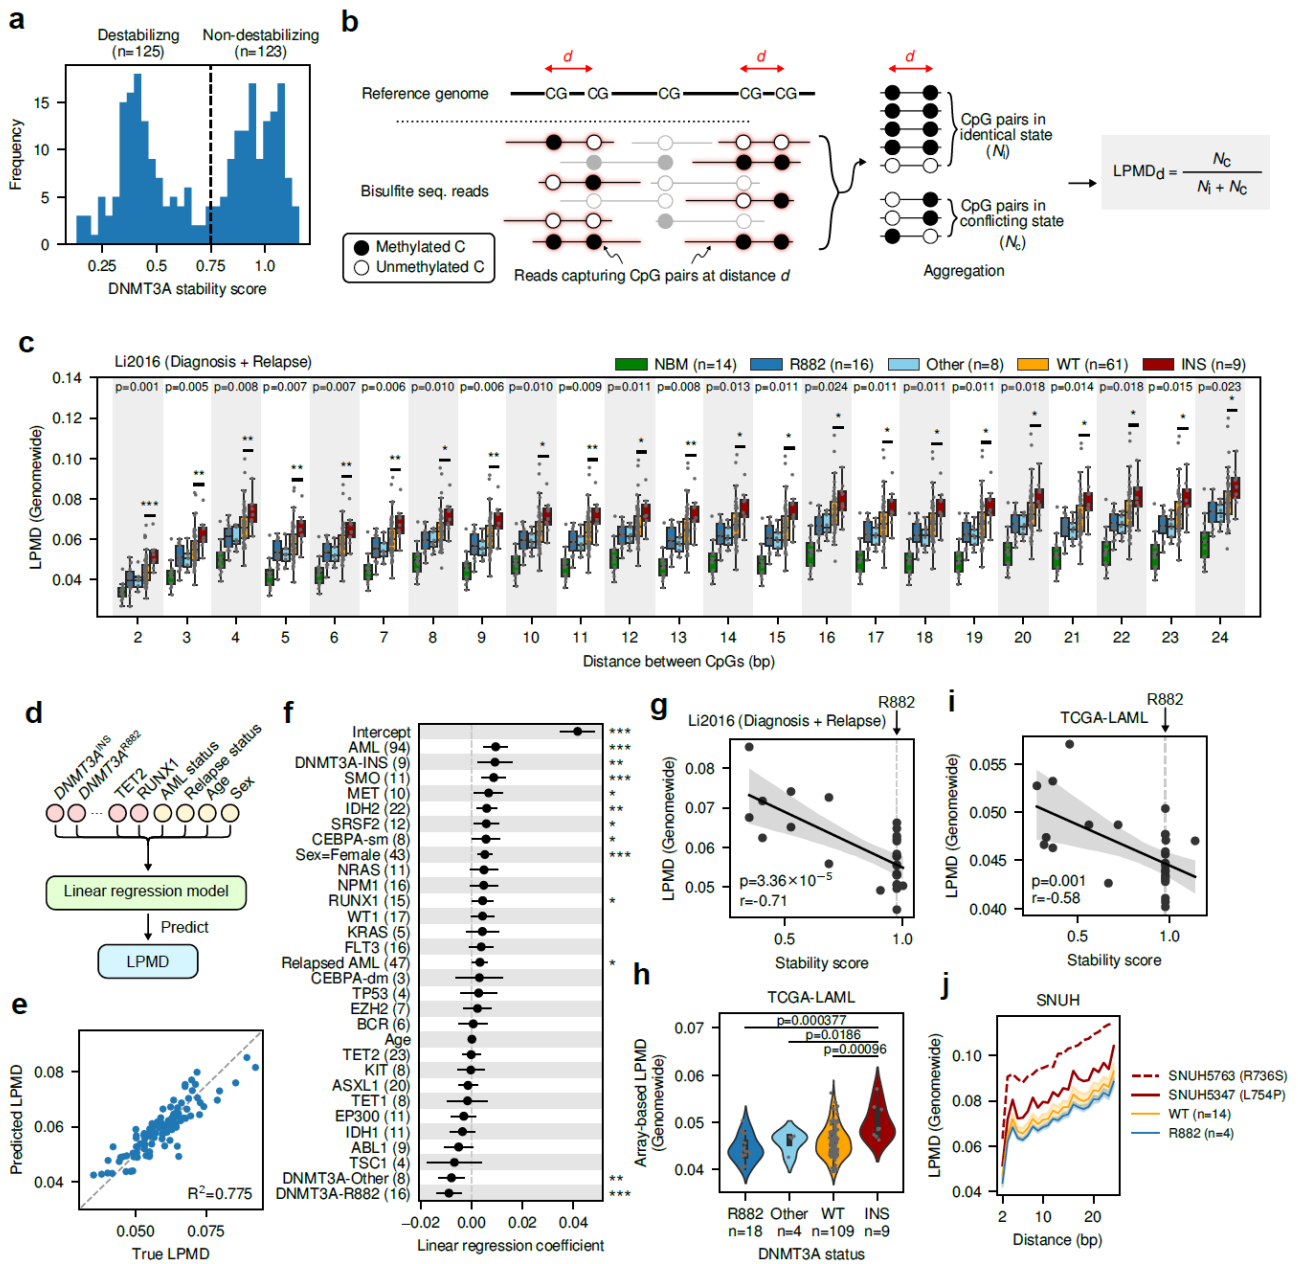

**Figure 1. DNMT3A AMLs show locally disordered DNA methylation patterns.** (a) Distribution of DNMT3A stability scores for 248 residues across DNMT3A protein. The dotted line denotes the threshold value 0.75 dividing destabilizing and non-destabilizing residues. (b) Description of local pairwise methylation discordance calculation. (c) Comparison of genomewide LPMD between different DNMT3A mutation subclasses in diagnosis and relapse AML samples from Li2016 cohort. P-values from two-sided Mann-Whitney U tests between DNMT3AWT and DNMT3A AINS subclasses are shown. (d) Schematic diagram illustrating the multiple linear regression analysis predicting LPMD values based on mutation status, age and gender. (e) Accuracy of LPMD values predicted by multiple linear regression analysis. (f) Coefficients and significances of regression coefficients. (g) Correlation between DNMT3A stability score and genomewide LPMD in Li2016 cohort. Pearson's correlation coefficient and corresponding p-value is shown. (h) Array-based LPMD of TCGA-LAML samples. P-values from two-sided Mann-Whitney U tests are shown. (i) Correlation between DNMT3A stability score and genomewide LPMD in TCGA-LAML cohort. Pearson's correlation coefficient and corresponding p-value is shown. (j) Genomewide LPMD comparison in SNUH cohort. In (c), \*\*\*  $p < 0.001$ , \*\*  $p < 0.01$ , \*  $p < 0.05$ , two-sided Mann-Whitney U test; The center line denotes the median, the upper and lower box limits denote upper and lower quartiles, and the whiskers denote  $1.5 \times$  interquartile range. In (f), CEBPA-sm, CEBPA with single mutation; CEBPA-dm, CEBPA with double mutation.

125        genomewide LPMD than any other *DNMT3A* subclasses ( $p=0.001$ , two-sided Mann-Whitney U test between WT and  
126 *DNMT3A*<sup>INS</sup> for 2bp-away CpG pairs; Figure 1c), suggesting the dysregulation of local correlations of DNA methylation  
127 states in *DNMT3A*<sup>INS</sup>. To ensure that the association between *DNMT3A*<sup>INS</sup> and locally disordered methylation states remains  
128 significant even after accounting for other co-occurring mutations, ages, and genders, we built a multivariate linear  
129 regression model predicting LPMD (Figure 1d, e) and found that the association between *DNMT3A*<sup>INS</sup> and high LPMD  
130 value was indeed significant after adjusting for such factors (Figure 1f). Notably, *DNMT3A*<sup>INS</sup> was shown to be the only  
131 *DNMT3A* mutation subclass that was positively associated with LPMD (multiple linear regression coefficient of 0.0095),  
132 which was in stark contrast to the negative association of the other *DNMT3A* mutation subclasses (multiple linear regression  
133 coefficient of -0.0093 and -0.0083 for *DNMT3A*<sup>R882</sup> and *DNMT3A*<sup>Other</sup>, respectively) on LPMD. It is worth noting that the  
134 age did not show significant correlation with LPMD values, suggesting that the contribution of aging-associated alterations  
135 of methylation patterns is insignificant in this case (Figure 1f). We verified that bisulfite conversion rates were greater than  
136 ~99.7% for all the examined eRRBS data (median 99.87%) and also were not correlated with LPMD values, thus excluding  
137 the possibility that the high LPMD occurring due to experimental artifacts (Supplementary Figure 2a, b).

138        We next examined whether the extent of the destabilization of DNMT3A induced by *DNMT3A*<sup>INS</sup> mutation correlates  
139 with LPMD. We found that the stability scores showed marked negative correlation with LPMD values (Pearson's  $r=-0.71$ ,  
140  $p=3.36\times 10^{-5}$ ; Figure 1g). In other words, more severe instability of DNMT3A was associated with greater local discordance  
141 of DNA methylation states. This result corroborates the putative relationship between the instability-driven reduction of  
142 intracellular DNMT3A concentration and increased DNA methylation disorder.

143        To verify whether these findings can be reproduced in an independent AML cohort, we conducted similar analysis for  
144 the TCGA-LAML cohort ( $n=140$ ). Since we only had methylation BeadChip array profiles for this cohort, we could not  
145 make use of the phasing information of methylation states as in the bisulfite sequencing data from Li2016 cohort. To  
146 circumvent this problem, we instead devised an array-based LPMD as an approximation of bisulfite sequencing-based  
147 LPMD (Methods) and computed it for the TCGA-LAML cohort. Of note, array-based LPMD serves as a lower bound of  
148 sequencing-based LPMD. As a result, we observed that *DNMT3A*<sup>INS</sup> AMLs had significantly high levels of local disorder  
149 of DNA methylation (Figure 1h). Furthermore, the array-based LPMD levels were also negatively correlated with the  
150 stability scores of corresponding *DNMT3A* variants (Figure 1i; Pearson's  $r=-0.58$ ,  $p=0.001$ ), reproducing the results from  
151 Li2016 cohort.

152        Additionally, we newly performed RRBS on our own cohort comprised of 20 AML patients (SNUH cohort;  
153 Supplementary Table 2). There were two patients with *DNMT3A*<sup>INS</sup> variants at position 754 (stability score 0.386) and 736  
154 (stability score 0.316). Of note, these variants were among the highly critical variants impacting the stability of the protein  
155 (top 17% and 7%, respectively). Again, those two *DNMT3A*<sup>INS</sup> AML patients showed markedly high genomewide LPMD  
156 values (Figure 1j). We confirmed that variant at 736 position is provoking decreased tetramerization at protein level with  
157 prominent formation of dimerization (Supplementary Figure 3).

158

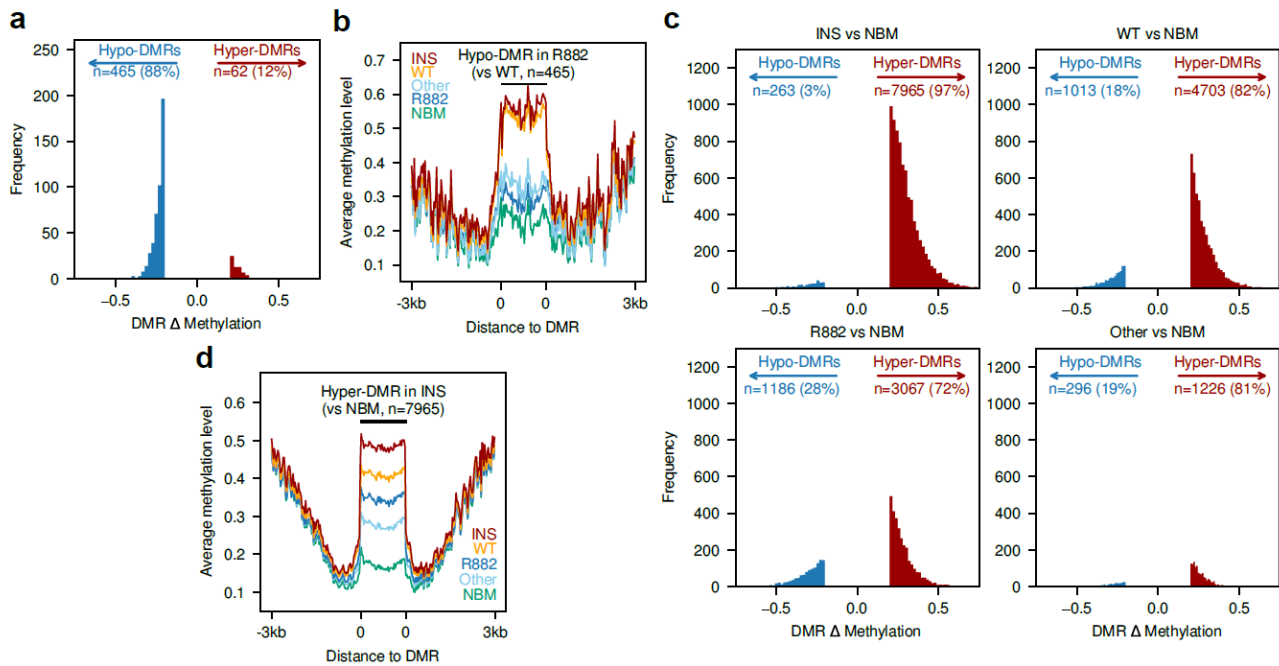

**Figure 2. Methylation profiles of  $DNMT3A^{INS}$  AMLs are similar to  $DNMT3A^{WT}$  AMLs, but not to that of  $DNMT3A^{R882}$ .** (a) Distribution of average methylation level difference in DMRs identified between  $DNMT3A^{R882}$  and  $DNMT3A^{WT}$  AMLs. (b) Average methylation levels of different  $DNMT3A$  mutation subclasses of AMLs around the hypo-DMRs identified between  $DNMT3A^{R882}$  and  $DNMT3A^{WT}$  AMLs. (c) Distribution of average methylation level difference in DMRs identified between different  $DNMT3A$  mutation subclasses and normal bone marrow cells using RRBS. (d) Average methylation levels surrounding the hyper-DMRs in  $DNMT3A^{INS}$  (vs normal bone marrow cells) for each  $DNMT3A$  mutation subclass.

159 Given the difference of  $DNMT3A^{INS}$  and  $DNMT3A^{R882}$  in terms of local DNA methylation disorder, we then  
 160 asked whether the difference of  $DNMT3A^{INS}$  and  $DNMT3A^{R882}$  AMLs can also be found in their mutational co-occurrence  
 161 patterns. We conducted mutational co-occurrence analyses using TCGA-LAML (n=180), BeatAML (n=281) and  
 162 Leucegene (n=263) cohorts. Although there was substantial inter-cohort difference of mutational co-occurrence and mutual  
 163 exclusivity patterns (Supplementary Figure 4a-c), we observed that  $DNMT3A^{INS}$  and  $DNMT3A^{R882}$  AMLs did not share  
 164 similar mutational patterns in both cohort-wise (Supplementary Figure 4a-c) and pooled (Supplementary Figure 4d)  
 165 analyses except for the co-occurrence with *NPM1* mutations. These results, along with the remarkable difference in local  
 166 disorder of DNA methylation between  $DNMT3A^{INS}$  and  $DNMT3A^{R882}$ , prompted us to seek for a deeper understanding of  
 167 the mechanistic difference between  $DNMT3A^{INS}$  and  $DNMT3A^{R882}$  AMLs in terms of their global methylation landscapes.

## 168 Methylation landscape of $DNMT3A^{INS}$ AMLs, in terms of methylation levels, is similar 169 to that of $DNMT3A^{WT}$ AMLs, but not $DNMT3A^{R882}$ AMLs

170 In general, it is widely known that the alteration of DNA methylation in cancer cells accompanies focal hypermethylation  
 171 of CpG-dense regulatory regions including CpG islands, as well as a global loss of DNA methylation. AML cells are no  
 172 exception to these epigenomic alterations. Beyond these malignancy-associated alterations,  $DNMT3A^{R882}$  AMLs are shown  
 173 to have distinct hypomethylation patterns compared to  $DNMT3A^{WT}$ , which arise from the attenuated AML-associated  
 174 hypermethylation and loss of methylation at regions normally maintained at high methylation level<sup>17</sup>. On the other hand,  
 175 the characteristic of the global methylation landscape of  $DNMT3A^{INS}$  AMLs has not been clearly elucidated so far.

176 To characterize the methylation landscape of  $DNMT3A^{INS}$  AML in terms of methylation levels, we first examined

177 whether *DNMT3A*<sup>INS</sup> AMLs also show the hypomethylation patterns observed in *DNMT3A*<sup>R882</sup> AMLs using Li2016 cohort,  
178 thereby seeking the similarities and differences of *DNMT3A*<sup>INS</sup> and *DNMT3A*<sup>R882</sup> methylomes. To determine the genomic  
179 regions subjected to *DNMT3A*<sup>R882</sup>-associated hypomethylation, we identified differentially methylated regions (DMRs)  
180 between *DNMT3A*<sup>R882</sup> and *DNMT3A*<sup>WT</sup> samples using an established method<sup>18</sup>. As expected, the identified DMRs  
181 predominantly consisted of hypomethylated DMRs (hypo-DMRs) in *DNMT3A*<sup>R882</sup>, accounting for 88% (465 of 527) of  
182 them (Figure 2a). Strikingly, we observed *DNMT3A*<sup>INS</sup> AMLs showed comparable DNA methylation level to that of  
183 *DNMT3A*<sup>WT</sup> at those identified *DNMT3A*<sup>R882</sup>-associated hypo-DMRs (Figure 2b). Additionally, these significant differences  
184 between *DNMT3A*<sup>INS</sup> and *DNMT3A*<sup>R882</sup> were also observed in TCGA-LAML and SNUH cohort (Supplementary Figure 5a  
185 and b). These results show that methylomes of *DNMT3A*<sup>INS</sup> AMLs are devoid of *DNMT3A*<sup>R882</sup>-associated hypomethylation  
186 patterns and underscore the clear difference between *DNMT3A*<sup>INS</sup> and *DNMT3A*<sup>R882</sup> in terms of their methylomes.

187 We were curious whether *DNMT3A*<sup>INS</sup> AMLs harbor any regions having altered DNA methylation levels uniquely for  
188 them, so we identified and compared the characteristics of DMRs between each *DNMT3A* subclass and normal bone  
189 marrow (NBM) samples. As a result, *DNMT3A*<sup>WT</sup> AMLs had 4703 (82%) hyper-DMRs and 1013 (18%) hypo-DMRs  
190 (Figure 2c). We note that the extreme bias toward hyper-DMRs may be due to a high specificity of eRRBS experiment for  
191 CpG-dense regions, which thus exaggerates cancer-associated hypermethylation events. Nevertheless, DMRs in  
192 *DNMT3A*<sup>R882</sup> AMLs were less skewed toward hyper-DMRs. They were associated with fewer hyper-DMRs (n=3067, 72%)  
193 and more hypo-DMRs (n=1186, 28%; Figure 2c), recapitulating the attenuated hypermethylation in *DNMT3A*<sup>R882</sup>. DMRs  
194 identified in *DNMT3A*<sup>INS</sup> AMLs were even more skewed toward hyper-DMRs (n=7965, 97%; Figure 2c). However, those  
195 hypermethylation events do not occur specifically in *DNMT3A*<sup>INS</sup>, as every *DNMT3A* subclasses of AMLs showed  
196 significant hypermethylation within the hyper-DMRs identified in *DNMT3A*<sup>INS</sup> (Figure 2d) and even within the hyper-  
197 DMRs that were exclusive to *DNMT3A*<sup>INS</sup> (Supplementary Figure 5c). The hyper-DMRs were also similarly distributed  
198 across genomic contexts (Supplementary Figure 5d). These observations indicate that the majority of hypermethylation in  
199 *DNMT3A*<sup>INS</sup>-associated hyper-DMRs originates from hypermethylation events that are generally observed in AML.

200 Altogether, these results suggest two conclusions for the methylation landscape of *DNMT3A*<sup>INS</sup> AML. First, since  
201 *DNMT3A*<sup>INS</sup> AMLs did not show *DNMT3A*<sup>R882</sup>-associated hypomethylation patterns, the current leukemogenic model for  
202 *DNMT3A*<sup>R882</sup> may not directly apply to *DNMT3A*<sup>INS</sup> AMLs. Next, the methylome of *DNMT3A*<sup>INS</sup> showing comparable  
203 levels of DNA methylation to *DNMT3A*<sup>WT</sup> implies that there are underlying molecular aberrations associated with  
204 *DNMT3A*<sup>INS</sup> other than the absolute DNA methylation level changes. This underscores the importance of the increased  
205 intratumoral DNA methylation heterogeneity, including the local disorder of DNA methylation, in *DNMT3A*<sup>INS</sup> AML.

206



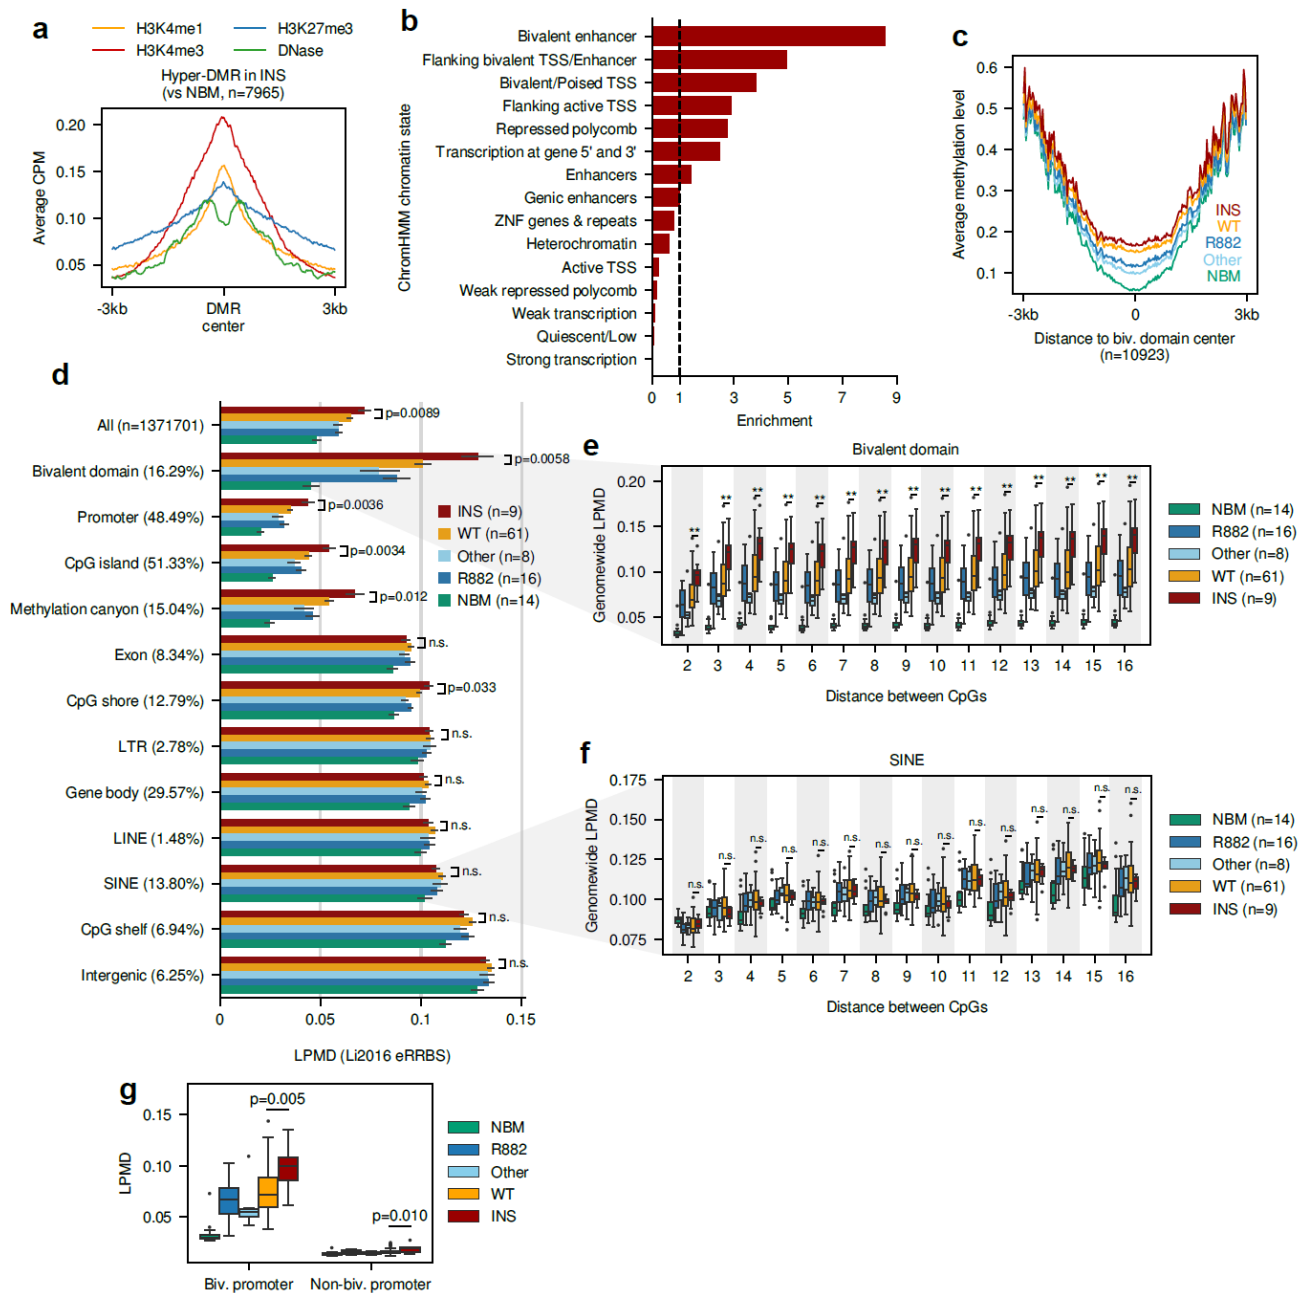

**Figure 3. Local disorder of methylation in *DNMT3A*<sup>INS</sup> AML occurs predominantly at bivalent domains.** (a) Average histone modification levels around hyper-DMR identified between *DNMT3A*<sup>INS</sup> and normal bone marrow cells. (b) ChromHMM chromatin context enrichment of hyper-DMR identified between *DNMT3A*<sup>INS</sup> and normal bone marrow cells. (c) Average methylation level surrounding bivalent domains. (d) LPMD distribution across different genomic contexts for Li2016 cohort. Parenthesized values denote the proportion of the analyzed CpGs within each genomic context, except for that next to 'All', which denote the total number of analyzed CpGs. P-values from two-sided Mann-Whitney U tests between *DNMT3A*<sup>WT</sup> and *DNMT3A*<sup>INS</sup> are shown. Error bars denote standard errors. (e, f) LPMD distributions in (e) bivalent domain and (f) SINE. (g) LPMD comparison in bivalent or non-bivalent promoters. P-values from two-sided Mann-Whitney U tests between *DNMT3A*<sup>WT</sup> and *DNMT3A*<sup>INS</sup> are shown. In (e) and (f), \*\* p < 0.01, \* p < 0.05, n.s. p > 0.05, two-sided Mann-Whitney U test. Throughout (e-g), the center line denotes the median, the upper and lower box limits denote upper and lower quartiles, and the whiskers denote 1.5× interquartile range.

208 **Local disorder of DNA methylation in *DNMT3A*<sup>INS</sup> AML occurs predominantly at**  
209 **bivalent domains**

210 Even though the precise molecular mechanism still remains obscure, previous experimental validation demonstrated that  
211 DNMT3A-dependent hypermethylation in AML cells occurs mostly at bivalent chromatin domains<sup>17</sup>. To provide additional  
212 line of evidence supporting that the observed hyper-DMRs in *DNMT3A*<sup>INS</sup> truly resulted from the catalytic activity of  
213 DNMT3A, we took advantage of a reference epigenome of CD34+ myeloid progenitor from ENCODE<sup>19</sup> and analyzed the  
214 epigenetic context of the hyper-DMRs. The resulting aggregated signals of several epigenomic marks surrounding the  
215 hyper-DMRs in *DNMT3A*<sup>INS</sup> are shown in Figure 3a. We observed that these regions colocalized with both active  
216 (H3K4me1/3) and repressive (H3K27me3) histone marks, which indeed are indicative of bivalent chromatin domains. We  
217 additionally validated that the hyper-DMRs in *DNMT3A*<sup>INS</sup> were strongly enriched for bivalent chromatin states inferred  
218 by ChromHMM<sup>20</sup> (Figure 3b). Of note, the observed hypermethylation patterns enriched at bivalent domains are not  
219 restricted to *DNMT3A*<sup>INS</sup>, but also shown in all the other *DNMT3A* subclasses (Figure 3c, Supplementary Figure 6a),  
220 whereas hypo-DMRs were enriched for enhancer-related genomic contexts (Supplementary Figure 6b). Altogether, these  
221 data collectively indicate that the identified hyper-DMRs, primarily located at bivalent domains, represent the genomic  
222 regions where the *de novo* methylation by DNMT3A takes place.

223 Given that the bivalent domains are the putative hotspots of *de novo* methylation in *DNMT3A*<sup>INS</sup> AMLs, we  
224 hypothesized that the DNA methylation disorder within those samples will be highly concentrated in those regions. To  
225 address this question, we computed LPMDs separately for 12 different genomic contexts. Surprisingly, we found that the  
226 difference of LPMD between *DNMT3A*<sup>INS</sup> and the other DNMT3A subclasses was almost exclusive at bivalent domains  
227 and regulatory regions including promoters, CpG islands, shores, and methylation canyons (Figure 3d). This high  
228 specificity of DNA methylation disorder toward bivalent domain (Figure 3e) is notable when compared with the LPMD  
229 distributions for CpGs located at SINEs (Figure 3f). Note that those two genomic contexts harbor a comparable number of  
230 analyzed CpGs (223,428 and 189,338 CpGs for bivalent domains and SINEs, respectively). Further, categorizing promoters  
231 into bivalent and non-bivalent promoters revealed that the difference of LPMD was restricted to bivalent promoters,  
232 whereas non-bivalent promoters showed only marginal absolute difference of LPMD (Figure 3g). Taken together, we  
233 concluded that the disordered methylation in *DNMT3A*<sup>INS</sup> AMLs is highly specific to bivalent domains, where the  
234 DNMT3A-driven *de novo* methylation potentially takes place. For convenience, we hereafter refer to the LPMD at bivalent  
235 domains as bivLPMD.

236

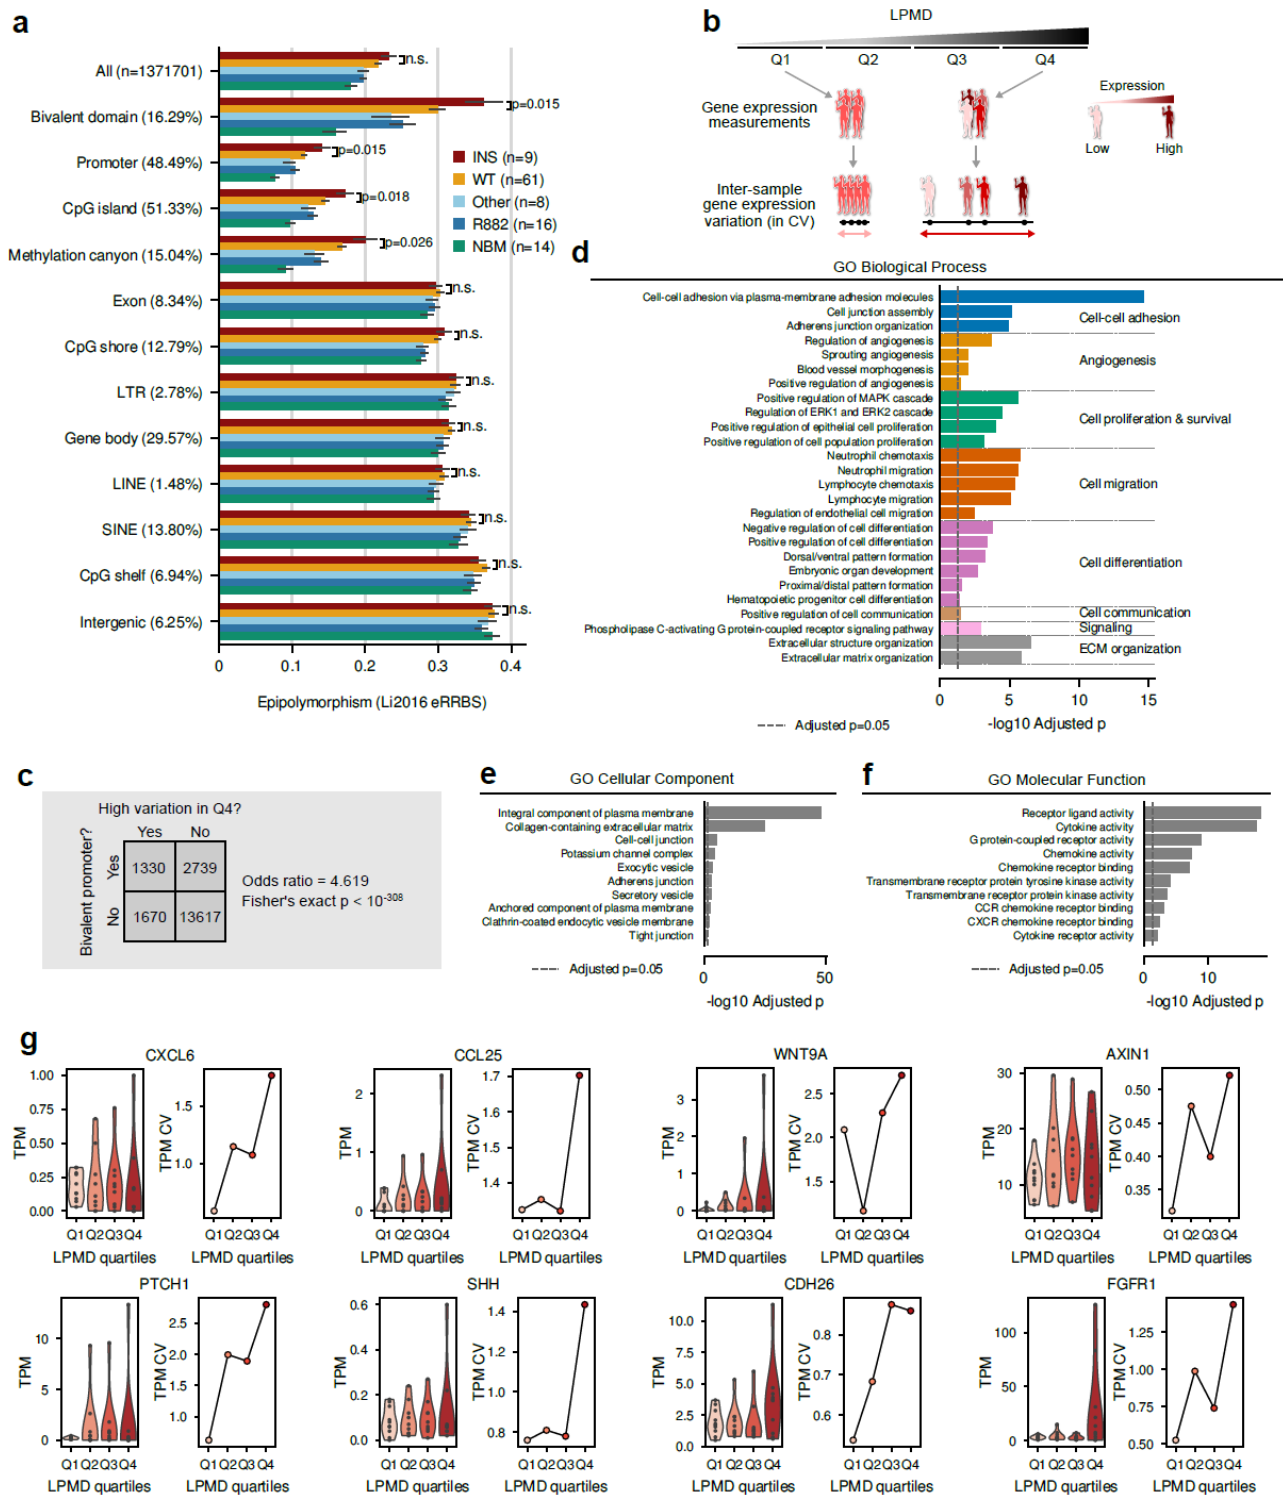

**Figure 4. Functional implications of local disorder of DNA methylation and concomitant epigenetic diversity in AML.** (a) Epipolymorphism distribution across different genomic contexts. P-values from two-sided Mann-Whitney U tests between *DNMT3A*<sup>WT</sup> and *DNMT3A*<sup>INS</sup> are shown. Error bars denote standard errors. (b) Experimental scheme to identify genes with methylation disorder-associated inter-sample expression variation. (c) Association between promoter bivalency and variable gene expression. Values in the table denote the number of genes in the corresponding condition. Odds ratio and p-value from two-sided Fisher's exact test are shown. (d-f) Functional enrichment of top 4000 genes showing highest inter-sample expression variation in fourth quartile (Q4) of LPMD values for (d) GO Biological Process, (e) GO Cellular Component, and (f) GO Molecular Function terms. In (d), GO terms are grouped by broader biological concepts that are shown on the right side. (g) Gene expression levels (in TPM) and their inter-sample coefficient of variation (CV) for eight representative genes. Samples were grouped according to LPMD quartiles; Q1 (n=10), Q2 (n=9), Q3 (n=9) and Q4 (n=10).

## 238 **DNA methylation disorder in *DNMT3A*<sup>INS</sup> AMLs leads to increased epigenetic** 239 **diversity of leukemic cell population**

240 Our observations so far demonstrate that *DNMT3A*<sup>INS</sup> AMLs were associated with the corruption of the local  
241 concordance of DNA methylation states. However, it should be interpreted with caution since it does not indicate the  
242 increase of the population-wise epigenetic diversity. LPMD is an intra-molecule measure<sup>21</sup> that individually accounts for  
243 each read originated from a single cell, so it is not suitable to discern whether the erosion of local correlation of DNA  
244 methylation states occurs in a coordinated or stochastic manner throughout the malignant cells.

245 To determine whether the local disorder *DNMT3A*<sup>INS</sup> AMLs accompanies the diversification of population-level  
246 epigenetic states, we orthogonally examined an inter-molecule DNA methylation heterogeneity score named  
247 epipolymorphism<sup>22</sup>. As a result, we observed significant increases of epipolymorphism in *DNMT3A*<sup>INS</sup> AMLs (Figure 4a),  
248 indicating that the erosion of local concordance of DNA methylation in *DNMT3A*<sup>INS</sup> AML occurs rather stochastically, and  
249 thus gives rise to the epigenetically diversified cell population. Of note, sample purity (Supplementary Figure 7a) and  
250 heterogeneity of cell type composition did not seem to confound the observed increased epigenetic diversity  
251 (Supplementary Figure 7b).

## 252 **High LPMD is associated with increased transcriptional variance of genes involved in** 253 **remodeling of leukemic stem cell niche**

254 Given the remarkable specificity of local DNA methylation disorder and epigenetic diversity at bivalent domains, we  
255 then sought the functional implications of DNA methylation disorders in leukemia development at the transcriptome level.  
256 Importantly, the promoters of the developmental genes in stem cells are widely known to be frequently marked by bivalent  
257 chromatin marks<sup>23</sup>. Thus, the heterogeneity of DNA methylation in developmental promoters occurring at *DNMT3A*<sup>INS</sup>  
258 AMLs suggests the possibility that the heterogeneity of the developmental gene regulation within leukemic cell population  
259 facilitates the progression of the disease by conferring the fitness advantage of cells.

260 To assess whether the epigenetic diversity of bivalent domains is associated with transcriptional diversity of the  
261 corresponding genes, a subset of Li2016 AML samples (n=38) profiled with both RRBS and RNA-seq data was analyzed.  
262 According to the additive property of variance, we assumed that the cell-level transcriptional variability, if it exists, will in  
263 turn manifest itself in the sample-level (i.e., bulk cell-level) transcriptional variability. Therefore, we measured and  
264 compared inter-sample variances of gene expression levels within each quartile of samples sorted by bivLPMD levels  
265 (Figure 4b).

266 We found that top 4,000 genes showing increased transcriptional variability in high-LPMD group (the highest quartile)  
267 were greatly enriched for genes having bivalent domains in their promoters (Odds ratio=4.619,  $p < 10^{-308}$ , Fisher's exact  
268 test; Figure 4c), which supports the linkage between the observed epigenetic heterogeneity of bivalent domains and the  
269 transcriptional heterogeneity. As expected, functions of those genes were enriched for cell differentiation (Figure 4d).  
270 Interestingly, we also found that they were also enriched for the biological processes shaping the hematopoietic stem cell  
271 niche in the bone marrow, including cell-cell adhesion, angiogenesis, cell proliferation and survival, cell communication,  
272 chemokine-mediated signaling and extracellular matrix organization (Figure 4d). Moreover, genes associated with high  
273 transcriptional variability were predominantly associated with cell membrane and extracellular matrix (ECM) (Figure 4e),  
274 suggesting the combinatorial diversification of the membrane protein configuration of progenitor cell, and eventually, the  
275 diversification of the modes of cell-cell and cell-ECM interaction within the hematopoietic stem cell niche. The enrichment  
276 of their molecular function towards membrane receptors, cytokines as well as chemokines also supports this notion (Figure

277 4f). Figure 4g demonstrates representative genes implying the heterogeneity of factors sculpting stem cell niche in high-  
278 bivLPMD AML samples. It highlights the transcriptional variability of cell adhesion molecule (*CDH26*), chemokines  
279 (*CXCL6* and *CCL25*), secreted signaling factors (*WNT9A* and *SHH*), signaling receptors (*PTCH1* and *FGFR1*) and  
280 downstream regulator (*AXINI*). As *WNT9A* and *AXINI* imply the heterogeneity of the activity of WNT signaling pathways,  
281 whose significance has been underscored in hematopoietic stem cell maintenance<sup>24, 25</sup>, we can envision that the diversity  
282 of the local concentration of paracrine factors in bone marrow stem cell niches may increase the fitness of leukemic stem  
283 cells communicating with it.

284 Collectively, these results showing the association of increased epigenetic and transcriptional variability propose a  
285 leukemogenic model that is worth exploring through functional experiments. It suggests that the increased transcriptional  
286 variability for both cell-intrinsic biological processes involving the balance between self-renewal and differentiation and  
287 cell-extrinsic factors surrounding each blast cell<sup>26</sup> may confer fitness advantages to leukemic cells. Specifically, the external  
288 factors include direct interaction with other blast cells sharing the niche through cell-cell junctions, and other secretory  
289 factors including signaling molecules, cytokines and chemokines, produced by nearby cells triggering the intracellular  
290 signal transduction. A population of malignant cells experiencing locally heterogeneous environment may result in the  
291 increased adaptive potential of the disease.

292

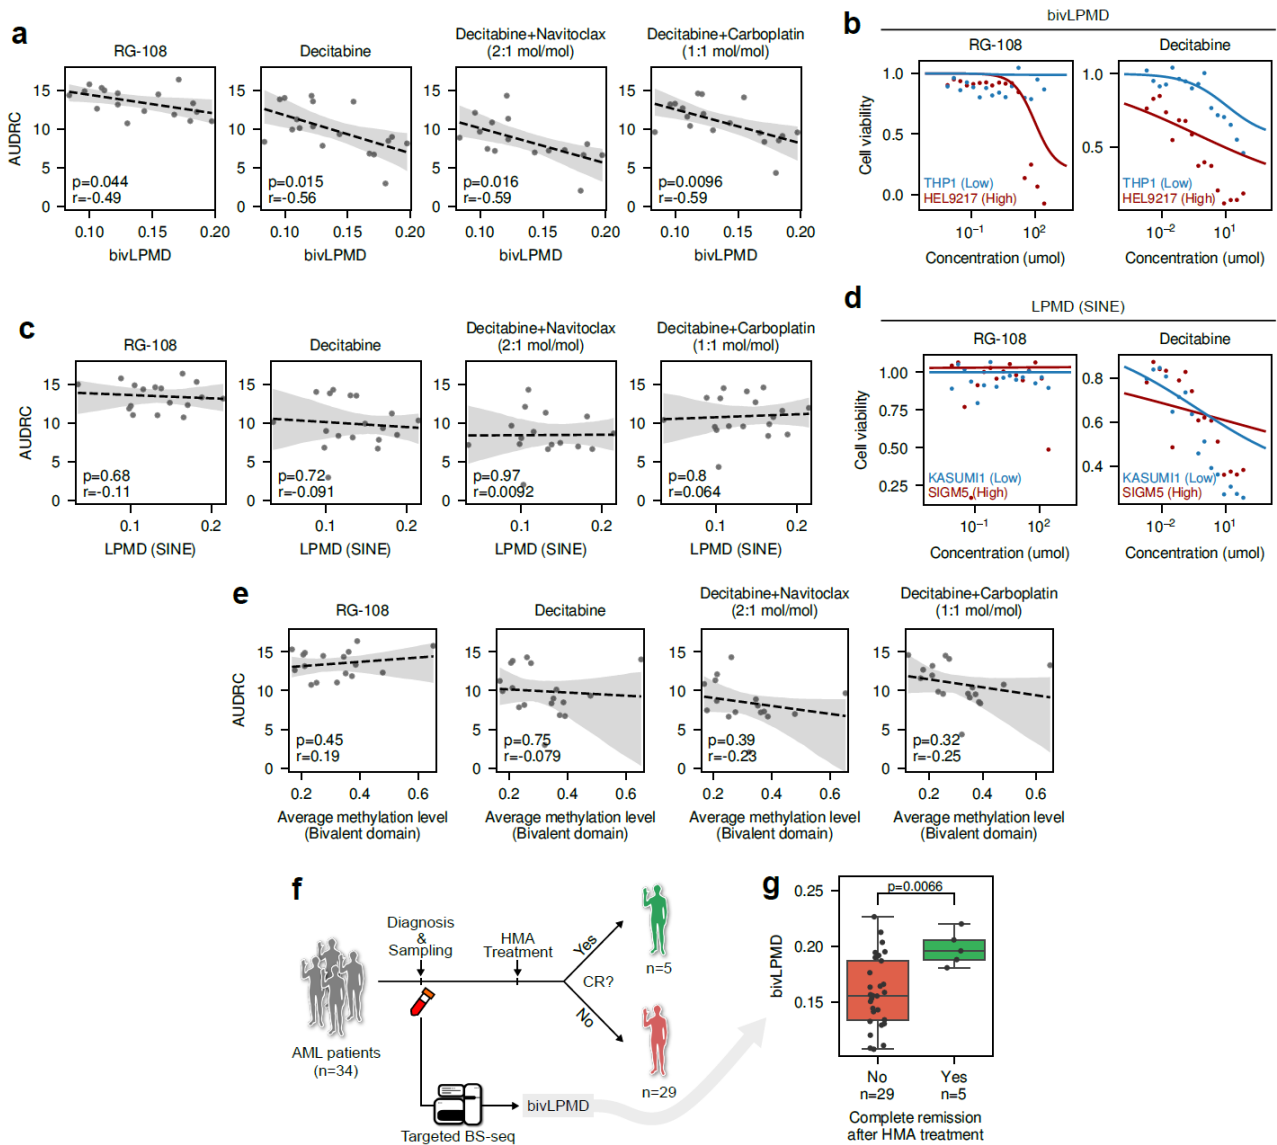

**Figure 5. DNA methylation disorder at bivalent domain correlates with HMA responses of AML cells.** (a) Correlation between LPMD at bivalent domains (bivLPMD) and area under dose-response curve (AUDRC) for hypomethylating agents. Pearson's correlation coefficients and corresponding p-values are shown. (b) Example dose-response curves for RG-108 and decitabine for two representative cell lines, THP1 and HEL9217, with low bivLPMD and high bivLPMD, respectively. (c) Correlation between LPMD at SINE and AUDRC for hypomethylating agents. Pearson's correlation coefficients and corresponding p-values are shown. (d) Example dose-response curves for RG-108 and decitabine for two representative cell lines, KASUMI1 and SIGM5, with low and high LPMD at SINE, respectively. (e) Correlation between average methylation level at bivalent domain and AUDRC. Pearson's correlation coefficients and corresponding p-values are shown. (f) Schematic diagram showing the retrospective analysis examining the utility of bivLPMD as a biomarker predicting hypomethylating agent (HMA) response. (g) Comparison of bivLPMD values in AML patient groups showing complete remission or not after HMA treatment. The center line denotes the median, the upper and lower box limits denote upper and lower quartiles, and the whiskers denote 1.5 $\times$  interquartile range. P-value from two-sided Mann-Whitney U test is shown. BS-seq, bisulfite-sequencing.

294 **DNA methylation disorder at bivalent domains, but not absolute level of DNA**  
295 **methylation, robustly predicts the response of AML cells to hypomethylating agents**

296 We then asked whether the local disorder of DNA methylation patterns at bivalent domains and associated  
297 epigenetic/transcriptomic diversity actually contribute to the sustained survival of AML cells. To examine the dependency  
298 of leukemic cells to DNA methylation disorder, we took a functional epigenomic approach by examining the survival of  
299 AML cells upon the elimination of the disorder of DNA methylation. To this end, we utilized the DNA methylation profiles  
300 of AML cell lines in Cancer Cell Line Encyclopedia (CCLE) and associated drug response profiles. Specifically, the drug  
301 responses of CCLE cell lines were collected from Cancer Therapeutics Response Portal (CTRP) v2, and DNA methylation  
302 profiles of corresponding cell lines were obtained by processing publicly available RRBS data by our own pipeline.

303 Meanwhile, hypomethylating agents (HMAs) including decitabine and azacitidine have been an invaluable epigenetic  
304 treatment option for AML patients who are not suitable for intensive chemotherapy<sup>27</sup>. Recent studies have shown complex  
305 and pleotropic mechanism of action of HMAs<sup>28,29,30</sup>, which in part explains why a robust biomarker predicting the response  
306 of a patient to HMA treatment still remains obscure. By examining the correlation between DNA methylation disorder and  
307 response of AML cell lines to HMA, we aimed to show the importance of the sustained methylation disorder in the survival  
308 of AML cells, as well as the potential of DNA methylation disorder as a biomarker for the response to HMA.

309 Strikingly, we observed a significant negative correlation between bivLPMD and the area under dose-response curve  
310 (AUDRC) of AML cell lines measured for decitabine (Figure 5a and b). This association persisted even when sufficient  
311 concentration of decitabine was treated in combination with other drugs (Figure 5a), suggesting that higher degree of DNA  
312 methylation disorder at bivalent domains predicts better response to decitabine. We additionally found that a high bivLPMD  
313 is also a good predictor of the response to RG-108, a non-nucleoside DNMT inhibitor that induces demethylation through  
314 direct binding to the active site of DNMTs (Figure 5a and b). We note that we could not observe any notable response to  
315 azacitidine for these AML cell lines, which may be due to an experimental artifact (Supplementary Figure 8). The  
316 association gradually diminished when the genomic regions for which LPMD values were calculated became distant from  
317 the core regulatory regions (from promoters and CpG islands to CpG shelves; Supplementary Figure 9), implying that the  
318 functional importance of the DNA methylation heterogeneity for the survival of AML cells was mediated by gene regulation.  
319 Remarkably, LPMDs calculated for non-bivalent non-regulatory regions did not show significant correlation with responses  
320 to HMAs (Figure 5c and d, Supplementary Figure 10) which further highlights that the DNA methylation disorder at  
321 bivalent regulatory domains is specifically important for the survival of AML cells. We also confirmed that bivLPMD did  
322 not correlate with the age of cell line at sampling time (Supplementary Figure 11a).

323 Importantly, the responses of AML cell lines to decitabine and RG-108 were not associated with their methylation  
324 levels *per se* (Figure 5e). These results provide additional evidence supporting that focal increase of average methylation  
325 levels observed in AML is a mere collateral consequence of myeloproliferation, and the viability of AML cells generally  
326 does not depend on them. It is noteworthy that these results collectively suggest that AML cells were ‘addicted’ to the  
327 methylation disorder, since the erasure of disordered methylation states with hypomethylating agents triggered their death.

328 To additionally confirm that our results on AML cell lines can be extended to clinical applications, we retrospectively  
329 measured the bivLPMD values using targeted enzymatic methyl-seq (EM-seq) from blood samples of 34 AML patients  
330 (Supplementary Table 3) who later underwent HMA treatment and examined its association with the response to HMA  
331 treatment (Figure 5f). Custom sequencing panel covering bivalent domains was designed for efficient measurement of

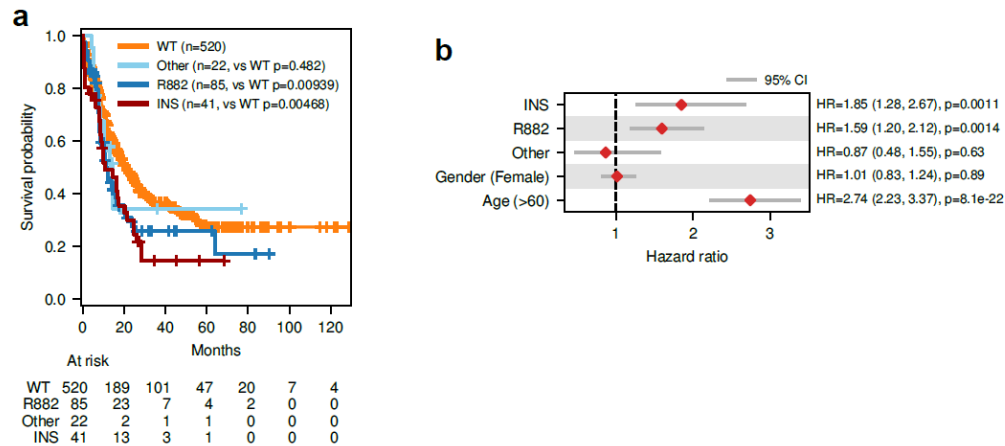

**Figure 6. Clinical implication of *DNMT3A*<sup>INS</sup> in hematological conditions.** (a) Survival analysis for AML patients with different *DNMT3A* mutation subclasses. (b) Multivariate Cox proportional-hazards regression results.

332 bivLPMD through targeted EM-seq (Methods). Reassuringly, bivLPMD values were shown to be a good predictor of  
 333 complete remission after HMA response (p=0.0066, two-sided Mann-Whitney U test; Figure 5g), while being not correlated  
 334 with patient age (Supplementary Figure 11b). Collectively, these results show the importance of bivLPMD in the survival  
 335 of AML cells, which is presumably due to the increased fitness advantage.

### 336 Clinical implications of *DNMT3A*<sup>INS</sup> in hematological disorders

337 Given the association between *DNMT3A*<sup>INS</sup> and increased local methylation disorder and its functional impact in AML,  
 338 we sought for the clinical outcomes of hematological conditions associated with *DNMT3A*<sup>INS</sup>. We first asked whether  
 339 *DNMT3A*<sup>INS</sup> is generally associated with adverse outcome of AML patients. To this end, we performed a pooled survival  
 340 analysis of 668 non-M3 AML patients using three large cohorts (Ley et al. (n=233), TCGA-LAML (n=179)<sup>12</sup> and  
 341 BeatAML (n=256)<sup>31</sup>). Both *DNMT3A*<sup>INS</sup> and *DNMT3A*<sup>R882</sup> showed significantly poorer overall survival compared to  
 342 *DNMT3A*<sup>WT</sup> (log-rank p=0.0094 and 0.0047, respectively; Figure 6a), while *DNMT3A*<sup>Other</sup> did not (p=0.482). Additionally,  
 343 multivariate Cox regression showed that *DNMT3A*<sup>INS</sup> is an independent risk factor (Hazard ratio 1.85, 95% CI 1.28-2.67)  
 344 of AML even after accounting for age and gender (Figure 6b).

345



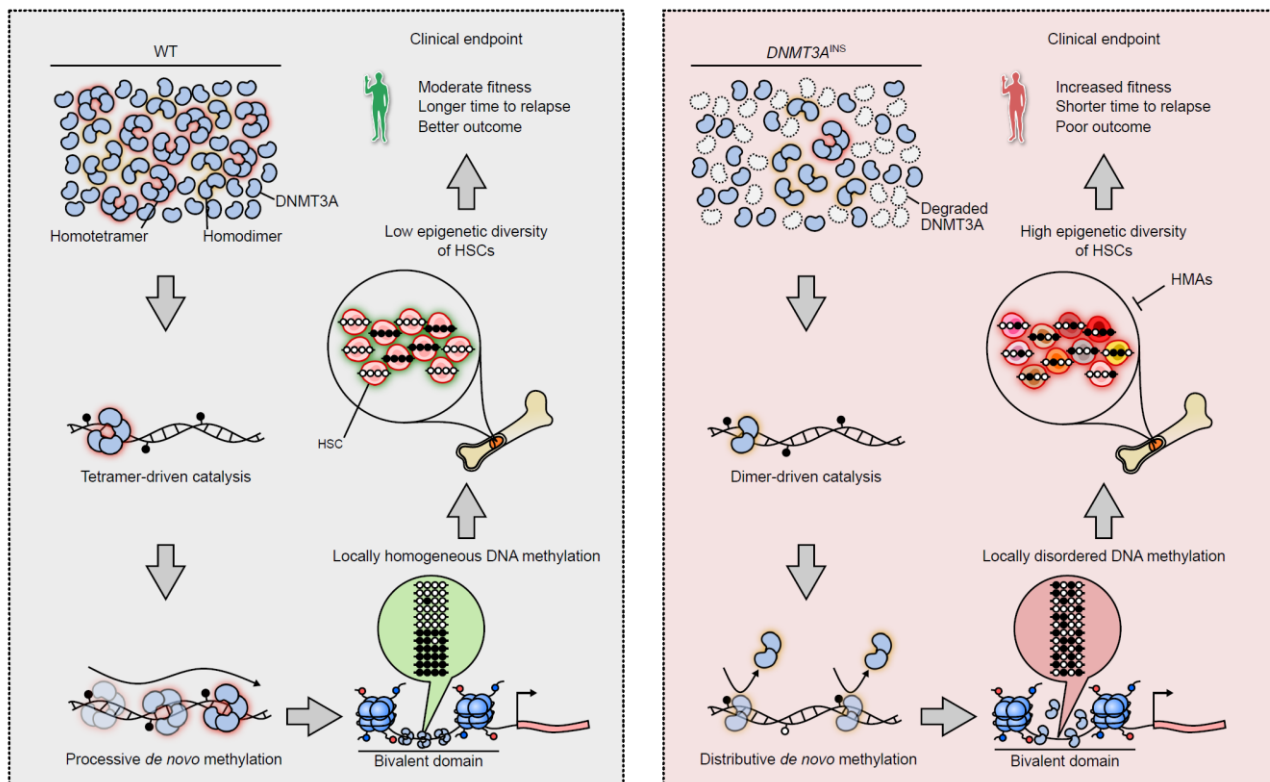

**Figure 7. Proposed model explaining the DNA methylation disorder induced by mutant DNMT3A<sup>INS</sup> and its clinical implications.**

Proteasomal degradation of destabilized DNMT3A proteins harboring DNMT3A<sup>INS</sup> mutations leads to decreased effective concentration of intracellular DNMT3A. Thus, the dimerization of DNMT3A protein is preferred over their tetramerization. Unlike DNMT3A tetramers, which conduct *de novo* methylation in a processive manner, DNMT3A dimers dissociate from DNA frequently during catalysis. This distributive *de novo* methylation results in stochastic local disorder of DNA methylation patterns, which in turn confers population-level epigenetic diversity of hematopoietic stem cells. Increased epigenetic diversity of cell population translates to increased fitness or adaptive potential of cell population, ultimately leading to poorer outcome of the patients.

## 346 Discussion

347 AML comprises heterogeneous subtypes of diseases that can be classified under microscopic inspection of cells or based  
 348 on genetic abnormalities. Although such subclassifications have been routinely utilized for the stratification of patient  
 349 outcomes and the decision of treatment regimens, there is still enough room for the discovery and definition of further  
 350 substratification of the disease. Since the early studies, the molecular classification of AML has highlighted remarkable  
 351 recurrence of mutations in epigenetic modifiers including DNMT3A, IDH1/2, and TET2. However, the link between  
 352 epigenetic alterations and aberrant epigenetic profiles has been only recently studied for its clinical relevance<sup>11, 32</sup>. In this  
 353 regard, the complicated mutational landscape of DNMT3A involving conspicuous enrichment of mutations at residue R882  
 354 and dispersed mutations throughout non-R882 residues provides an excellent opportunity to investigate the mechanistic  
 355 connection between genetic and epigenetic alterations.

356 In this study, we characterize the methylomes of AMLs harboring DNMT3A mutations that reduce the stability of the  
 357 protein by analyzing the methylation profiles from three different AML cohorts. We show that they were associated with  
 358 highly disordered local DNA methylation patterns specifically at bivalent domains, which in turn leads to the epigenetic  
 359 diversity of AML cell population. As far as our knowledge is concerned, this is the first study that systematically analyzes  
 360 the effect of the destabilization of DNMT3A directly on the methylomes of AML patients.

361 To date, researchers have been struggling to clearly provide the common effect of non-R882 DNMT3A mutations on

362 leukemia, as the functional consequences of non-R882 mutations vary widely for the activity of the mutant proteins<sup>33</sup>. In  
363 line with this challenge, our results suggest a new perspective: the effect of individual non-R882 mutation on enzymatic  
364 activity may not be critical, at least for *DNMT3A*<sup>INS</sup> mutations. This is because a mutant DNMT3A harboring one of those  
365 mutations is prone to be degraded and thus would not actively participate in *de novo* methylation. Instead, our results  
366 suggest that the common consequence of *DNMT3A*<sup>INS</sup> variants, namely the reduction of intracellular DNMT3A  
367 concentration, is a key factor affecting the initiation and progression of AML.

368 Nevertheless, it seems that some *DNMT3A*<sup>INS</sup> variants, especially those residing in the tetramer interface, further  
369 strengthen the dimeric preference of the enzyme by hampering the tetramerization by weakening the interaction at the  
370 tetramerization interface. Our experimental results showing the predominant dimerization of R736S DNMT3A *in vitro*  
371 (Supplementary Figure 3) suggest that some non-R882 variants may further promote the dimeric preference of the enzyme.  
372 Such residues that can elicit the synergy between destabilization and interface effect include S714 (stability score 0.688),  
373 R729 (stability score 0.364), R736 (stability score 0.316), R749 (stability score 0.339), S770 (stability score 0.419) and  
374 R771 (stability score 0.527), and they are shown to be among the most frequently mutated residues in hematological  
375 malignancies following R882 (Supplementary Figure 12).

376 Our observations suggest a potential explanation for the enigmatic recurrence of *DNMT3A*<sup>INS</sup> variants in AML that has  
377 been poorly accounted for. In particular, our results link the biochemical property of DNMT3A<sup>INS</sup> and the local DNA  
378 methylation disorder in *DNMT3A*<sup>INS</sup> AML (Figure 7). The reduced dosage of intracellular DNMT3A due to the instability-  
379 driven degradation of DNMT3A<sup>INS</sup> may favor the dimerization of DNMT3A over its tetramerization, as supported by the  
380 experimental study showing that the DNMT3A oligomerization is determined by its concentration<sup>15</sup>. Thus, *DNMT3A*<sup>INS</sup>  
381 AML may show prevalent dimer-driven distributive *de novo* DNA methylation, whereas *DNMT3A*<sup>WT</sup> AML exerts tetramer-  
382 driven processive catalysis. Distributive methylation leads to a decreased concordance of local DNA methylation states,  
383 and the random dissociation of DNMT3A dimers from DNA in turn triggers the concomitant increase of the epigenetic  
384 diversity of cancer cell population. Although the clear mechanism of how the epigenetic diversity drives the progression  
385 and aggressiveness of AML cells still remains to be elucidated, our results showed the association between epigenetic and  
386 transcriptional heterogeneity of leukemic cells. Especially, the functional heterogeneity was enriched for genes contributing  
387 to the fitness of leukemic stem cells within the hematopoietic stem cell niche. Furthermore, the correlation between the  
388 epigenetic diversity at bivalent regulatory domains and response to HMA implies the connection between epigenetic  
389 diversity and transcriptional heterogeneity of cancer cells.

390 Cancer has long been appreciated as an intrinsically heterogeneous disease. Genetically and epigenetically distinct cells,  
391 or subclones, arise from sporadic molecular aberrations, and they compete and cooperate with each other while exploiting  
392 the limited resources surrounding them. For recent decades, the extent of such intratumor heterogeneity has shown great  
393 potential as a clinical biomarker. However, studies so far have primarily focused on their prognostic power, and it is still  
394 questionable that the heterogeneity itself can be exploited as an actionable therapeutic target. In this regard, epigenetic  
395 intratumor heterogeneity, thanks to its reversible nature, would bring a novel therapeutic avenue that exploits direct  
396 manipulation of the heterogeneity of cancer cell population, i.e., homogenization of epigenetic states of cancer cells. Such  
397 intervention may undermine the fitness of cancer cell population, which ultimately triggers cell death. Indeed, this proposed  
398 mechanism may have already been implicitly functioning behind the conventional HMA treatments, but it has not been  
399 clearly elucidated before, as shown by the lack of DNA methylation-based biomarkers for HMAs. Our observations from  
400 functional epigenomic analyses in part support this scenario, and further provide an effective way to predict the response  
401 of AML cells to HMAs, which greatly increase the precision of the antileukemic therapies in clinical practice.

## 402 **Methods**

### 403 **RRBS**

404 To construct the MSP1 and ApeKI digested reduced-representation bisulfite sequencing (RRBS) library, 500 ng of input  
405 genomic DNA was assembled into 50  $\mu$ l of reactions with MspI (NEB), incubated at 37°C for 24–26 h. ApeKI (NEB) was  
406 then added and incubated at 75°C for 16–20 h. The digested products were purified with a MiniElute PCR Purification Kit  
407 (Qiagen). After purification, the digested products were blunt-ended, and then dA was added, followed by methylated-  
408 adapter ligation. A range of 160–420 adapter-ligated fraction was excised from a 2% agarose gel. Bisulfite conversion was  
409 conducted using a ZYMO EZ DNA Methylation-Gold Kit™ (ZYMO), following the manufacturer's instructions. The final  
410 libraries were generated by PCR amplification using PfuTurbo Cx Hotstart DNA polymerase (Agilent technologies, Santa  
411 Clara, CA, USA). RRBS libraries were analyzed by an Agilent 2100 Bioanalyzer (Agilent Technologies). The methylation  
412 data were generated using two different platforms, Illumina HiSeq 2500 Standard 100 PE (100bp paired end) and NovaSeq  
413 6000 S4 150 PE (150bp paired end).

### 414 **Collecting and processing public DNA methylation data**

415 DNA methylation profiles for the public cohorts analyzed in this study were collected and processed as follows. Raw  
416 eRRBS sequencing data for 47 AML patients<sup>8</sup> were obtained from dbGaP under accession phs001027.v2.p1. Sequencing  
417 was performed for each patient at both points of diagnosis and relapse, thus resulting in 94 sequencing runs in total. Bisulfite  
418 sequencing reads were adapter-trimmed with Trim galore!<sup>34</sup> v0.6.7 with --rrbs option turned on. Reads were aligned to the  
419 hg38 reference genome with Bismark<sup>35</sup> v0.22.3, and CpG methylation levels were extracted using MethylDackel<sup>36</sup> v0.4.0.  
420 The same RRBS processing pipeline was applied to our own SNUH cohort.

421 Illumina HumanMethylation450 BeadChip array-based DNA methylation profiles of 140 TCGA-LAML patients were  
422 downloaded from Genomic Data Commons (GDC) data portal.

### 423 **Sample collection for SNUH cohort**

424 The samples were collected in accordance with the guidelines and regulations of the Seoul National University Hospital  
425 [IRB No. H-1103-004-353]. DNMT3A mutations for patients with AML or myelodysplastic syndrome patients were  
426 identified using clinical NGS panel screening.

### 427 **Definition of *DNMT3A*<sup>INS</sup> variants and *DNMT3A*<sup>INS</sup> AML**

428 *DNMT3A*<sup>INS</sup> variants were identified using the catalog of stability ratios of *DNMT3A* amino acid substitutions that were  
429 experimentally determined by previous study<sup>6</sup>. Although the catalog covers a large number of residues (248 / 912 amino  
430 acids), still some of mutations occurring in clinical AML samples are not covered. Therefore, we extrapolated the ratios to  
431 assign stability scores for those uncharted substitutions by assigning a single stability score for each amino acid position,  
432 instead of each amino acid substitutions. It was done by computing the average of all known stability ratios resulting from  
433 the substitution each amino acid. Indeed, this procedure makes individual stability score less sensitive to the amino acid  
434 properties, thus some false positive or negative *DNMT3A*<sup>INS</sup> classification can be produced. However, we considered that  
435 it will be more beneficial to increase the sensitivity of the whole study by incorporating more variants to the analyses.

436 All variants having processed stability scores below 0.75 were classified as *DNMT3A*<sup>INS</sup>. Moreover, nonsense and  
437 frameshift variants were also included as part of *DNMT3A*<sup>INS</sup> variants, as the truncation of DNMT3A protein are known to  
438 cause protein degradation in AML cells<sup>37</sup>. An AML sample was classified as *DNMT3A*<sup>INS</sup> AML only if it harbors a single

439 mutation on *DNMT3A* gene and it is *DNMT3A*<sup>INS</sup>. If a sample harbor *DNMT3A*<sup>R882</sup> mutation, it was classified as  
440 *DNMT3A*<sup>R882</sup> AML regardless of the existence of other mutations to reflect the dominant-negative effect of *DNMT3A*<sup>R882</sup>  
441 variant. All the other samples having non-stabilizing variants or multiple variants were classified as *DNMT3A*<sup>Other</sup>.

## 442 **Collecting and processing somatic mutation profiles**

443 Somatic variants for each individual were determined as follows. Whole exome sequencing data for Li2016 cohort were  
444 accessed via dbGaP under accession phs001027.v2.p1. In total, whole exome sequencing runs for 94 cancer samples  
445 (diagnosis and relapse) as well as 47 matched normal samples were obtained. Reads were aligned to hg38 reference genome  
446 with bwa v0.7.17-r1188<sup>38</sup>. To increase the sensitivity of variant calls, we considered somatic variants called by at least one  
447 of Strelka2<sup>39</sup> v2.9.10 and Varscan<sup>40</sup> v2.4.4 as valid somatic variants. Resulting variants were annotated with SnpEff<sup>41</sup> v5.0  
448 and SnpSift<sup>42</sup> v4.3t. Finally, variants were post-filtered to avoid false positive calls using the following criteria: (1) variants  
449 should be present with variant allele frequency greater than 5%, (2) variant alleles should be supported by at least five  
450 sequencing reads, (3) variants should not be present with ExAC population allele frequency more than 1%, and (4) only  
451 missense, nonsense, frameshift and splice variants were considered. For TCGA-LAML cohort, we collected the  
452 corresponding mutational profiles from cBioPortal<sup>43</sup>.

## 453 **Computation of local pairwise methylation discordance (LPMD)**

454 To measure the disorder of DNA methylation, we devised a new measure called local pairwise methylation discordance  
455 (LPMD) that measures the extent to which a pair of nearby CpGs at a fixed distance have conflict in their methylation  
456 states. LPMD takes advantage of the phased methylation states of nearby CpGs that are simultaneously captured by a single  
457 bisulfite sequencing read. Through the enumeration of all the sequencing reads, LPMD<sub>d</sub> is computed as the proportion of  
458 CpG pairs at genomic distance  $d$  (in bp) with different methylation states. LPMD values were computed using Meteor  
459 v0.1.2<sup>16</sup>.

460 On the other hand, we cannot extract a pair of DNA methylation states that originates from a single cell (i.e., phased  
461 methylation states) using the results from DNA methylation arrays. To approximate sequencing-based LPMD values using  
462 methylation levels measured by DNA methylation arrays, the difference of DNA methylation levels of a CpG pair at a fixed  
463 distance was utilized. The use of this measure can be justified by the fact that the methylation level difference of CpG pair  
464 forms the lower bound of LPMD. Assume that there is a CpG pair with methylation level  $\beta_1$  and  $\beta_2$ , where  $\beta_1 < \beta_2$ ,  
465 without loss of generality. Then, the maximum proportion of CpG pairs both having methylated state will be  $\beta_1$ . Similarly,  
466 the maximum proportion of CpG pairs both having unmethylated state will be  $1 - \beta_2$ . Thus, the lowest possible proportion  
467 of CpG pairs having different methylation state is  $1 - (\beta_1) - (1 - \beta_2) = \beta_2 - \beta_1$ , which is the methylation level  
468 difference of the pair. Sample-wise array-based LPMD was computed similarly to sequencing-based LPMD by specifying  
469 the distance between CpG pairs.

## 470 **Computation of epipolymorphism**

471 Epipolymorphism<sup>22</sup> is a cell population-wise measure that quantifies the diversity of methylation patterns, or epialleles, of  
472 four consecutive CpG sites (CpG quartets). To compute epipolymorphism from bisulfite read alignments of Li2016 cohort,  
473 we only considered CpG quartets that are supported by more than ten sequencing reads. CpG quartets harboring CpG site  
474 that overlaps with dbSNP 151 SNPs were excluded. For each CpG quartets, epipolymorphism is defined considering 16  
475 possible patterns of DNA methylation states. For convenience, here we denote unmethylated and methylated states as '0'  
476 and '1', respectively. Then we can think of 16 possible DNA methylation patterns from  $x_0 = 0000$  (fully unmethylated

477 pattern) to  $x_{15} = 1111$  (fully methylated pattern), and epipolymorphism is defined as below.

478 
$$\text{Epipolymorphism} = 1 - \sum_{i=0}^{15} \left(\frac{n_i}{N}\right)^2$$

479 where  $n_i$  denotes the number of reads supporting pattern  $x_i$  and  $N = \sum_{i=0}^{15} n_i$ . Epipolymorphism values were computed  
480 using Methoeor v0.1.2<sup>16</sup>.

## 481 **Reference epigenome for CD34 hematopoietic stem cells**

482 Reference epigenomes for CD34-positive hematopoietic stem cells (HSCs) were downloaded from ENCODE under  
483 accession number ENCSR970ENS. In particular, the raw whole genome bisulfite sequencing data was downloaded under  
484 library accession ENCLB590SRF and was processed as described above. Processed signal p-values and called peaks for  
485 ChIP-seq targeting H3K4me1, H3K4me3, H3K9me3, H3K27me3, H3K27ac and H3K36me3 histone marks were  
486 downloaded under accession number ENCSR401CJA, ENCSR136QKZ, ENCSR957WQX, ENCSR355PUX,  
487 ENCSR620AZM and ENCSR164ROX, respectively. Similarly, signal p-values and peaks for DNase I hypersensitive sites  
488 were downloaded under accession ENCSR468ZXN. For the subsequent analyses, signal p-values were normalized with  
489 arcsinh transformation. The core 15-state chromatin states inferred by ChromHMM<sup>20</sup> were downloaded from Roadmap  
490 Epigenomics for the enrichment analysis of differentially methylated regions. Bivalent domains in CD34-positive  
491 hematopoietic stem cells are defined as the genomic regions with chromatin states named 10\_TssBiv, 11\_BivFlnk or  
492 12\_EnhBiv.

## 493 **Selection of the bivalent domains for targeted enzymatic methyl-seq**

494 We selected representative bivalent domains that show pronounced methylation disorder in *DNMT3A*<sup>INS</sup> AMLs compared  
495 to HSCs for targeted enzymatic methyl-seq (EM-seq). To obtain sufficient depths for the targeted regions, the total span of  
496 the sequencing panel was aimed to be about 500kbp, which is about 4% of the bivalent domains in the HSC reference  
497 epigenome (~12,526 kbp in total). The following describes how we prioritized bivalent domains to be selected for the panel.  
498 First, bivalent domains were ranked by average difference of DNA methylation level between SNUH5763 sample and HSC  
499 reference epigenome. At the same time, they were ranked also by density of containing CpGs (number of CpGs divided by  
500 the length of the region). Of note, we found that a majority of (90%) bivalent domains were hypermethylated, and higher  
501 density of CpGs was positively correlated with methylation level difference (Pearson's  $r=0.554$ ,  $p < 10^{-308}$ ). Final ranks  
502 were obtained by taking geometric mean of methylation level difference and CpG density for each bivalent domain and  
503 the top 454 bivalent domains spanning 499,859bp were selected for the panel.

## 504 **Targeted enzymatic methyl-seq**

505 We applied an improved methylation detection using EM-Seq to avoid loss of DNA, GC biased coverage, and poor  
506 complexity compared with BS-Seq<sup>44</sup>. Targeted capture panel was designed to tile the selected bivalent domains (10bp  
507 flanking). 4,200 hybrid capture probes using the Twist target enrichment (Twist Bioscience, San Francisco, CA, USA) were  
508 synthesized to capture ~58,000 CpGs within the selected bivalent domain regions. Genomic DNA samples were fragmented  
509 physically by Covaris (200 to 300bp). Methylated cytosine residues of initial 200ng input gDNA were converted  
510 enzymatically by Twist Bioscience's NEBNext Enzymatic Methyl-Seq (EM-Seq). Then pre-PCR amplification and sample  
511 library preparation were processed. Twist fast hybridization target enrichment with 8-plexing, post PCR amplification, and

512 libraries were sequenced on DNBSEQ-G400 Dx (MGI Tech, Shenzhen, CHINA) with 100bp paired-end reads with a  
513 minimum coverage of 280x (average coverage 380x; 234x~559x).

## 514 **Genome annotations**

515 All the bioinformatics analyses were performed with hg38 human reference genome. Annotations for human CpG islands  
516 were downloaded from UCSC Table Browser. Based on the CpG island annotations, annotations for CpG shores (defined  
517 as up/downstream 2kb regions flanking CpG islands) and CpG shelves (defined as further up/downstream 2kb regions  
518 flanking the borders of CpG shores) were obtained using BEDTools<sup>45</sup> v2.26.0. Gene annotations were obtained from  
519 GENCODE<sup>46</sup> v32 release. Annotations for CpG methylation canyons were obtained from a previous study<sup>47</sup>.

## 520 **Identification of differentially methylated regions**

521 Differentially methylated regions (DMRs) between various *DNMT3A* subclasses were identified by metilene v0.2-8<sup>18</sup>. We  
522 required at least 4 CpGs for a region to be called as a DMR, while allowing at most 500bp-away adjacent CpG pair within  
523 a DMR. Among those candidate regions, regions showing methylation difference greater than 0.2 and showing Benjamini-  
524 Hochberg adjusted p-value less than 0.01 were finally called as DMRs.

## 525 **Drug response analysis**

526 Drug response analyses were conducted by reanalyzing public experimental results for Cancer Cell Line Encyclopedia  
527 (CCLE)<sup>48</sup> cell lines. Only the cell lines of hematopoietic lineage derived from AML that have associated raw RRBS data  
528 were used. Raw RRBS data were obtained under SRA accession SRP186687 and processed as described above. To avoid  
529 spurious methylation calls we excluded CpGs that overlaps with SNPs using dbSNP version 151. Moreover, we excluded  
530 CpGs located at ENCODE blacklisted regions<sup>49</sup> and their flanking 1000bp regions from analysis.

531 The responses of the cell lines to hypomethylating agents were adopted from Cancer Therapeutics Response Portal  
532 (CTRP) v2<sup>50</sup>. Area under drug response curve (AUDRC) was used as a measure of drug response, and the fitted curve was  
533 reconstructed and visualized with the following four-parameter logistic nonlinear regression model<sup>51</sup>:

$$534 \quad y = 1 + \frac{b - 1}{1 + \left(\frac{c}{x}\right)^s}$$

535 where  $x$  is the concentration of the drug at which the response of cells is to be computed,  $c$  is the dosage of the drug  
536 where the 50% of cells shows response,  $b$  is the baseline response, which denotes the response of cells at sufficiently high  
537 concentration of the drug and  $s$  is the steepest slope of the logistic curve.

538

## 539 **Acknowledgements**

540 This research was supported by a grant from the Korea Health Technology R&D Project through the Korea Health Industry  
541 Development Institute (KHIDI), funded by the Ministry of Health & Welfare, Republic of Korea (grant number:  
542 HI18C1876) (to Y. K). This research was also supported by a grant (grant number: NRF-2020R1A2B5B03001517) from  
543 the National Research Foundation of Korea (to J.S). Genome Opinion Inc. implemented and optimized the targeted  
544 enzymatic methyl-seq panel (LifeEx EM) and provided the sequencing data.

## 545 **Additional information**

546 All RRBS and EM-seq data generated in this study were deposited in the NCBI Sequence Read Archive (SRA) database  
547 under project accession PRJNA933381.

548

549

## References

- 550 1. Yang L., Rau R., Goodell M. A. DNMT3A in haematological malignancies. *Nat Rev Cancer* **15**, 152-165 (2015).
- 551
- 552 2. Chen T., Ueda Y., Dodge J. E., Wang Z., Li E. Establishment and maintenance of genomic methylation patterns  
553 in mouse embryonic stem cells by Dnmt3a and Dnmt3b. *Mol Cell Biol* **23**, 5594-5605 (2003).
- 554
- 555 3. Brunetti L., Gundry M. C., Goodell M. A. DNMT3A in Leukemia. *Cold Spring Harb Perspect Med* **7**, (2017).
- 556
- 557 4. Russler-Germain D. A., *et al.* The R882H DNMT3A mutation associated with AML dominantly inhibits wild-  
558 type DNMT3A by blocking its ability to form active tetramers. *Cancer Cell* **25**, 442-454 (2014).
- 559
- 560 5. Emperle M., *et al.* The DNMT3A R882H mutation does not cause dominant negative effects in purified mixed  
561 DNMT3A/R882H complexes. *Sci Rep* **8**, 13242 (2018).
- 562
- 563 6. Huang Y. H., *et al.* Systematic Profiling of DNMT3A Variants Reveals Protein Instability Mediated by the  
564 DCAF8 E3 Ubiquitin Ligase Adaptor. *Cancer Discov*, (2021).
- 565
- 566 7. Landau D. A., *et al.* Locally disordered methylation forms the basis of intratumor methylome variation in chronic  
567 lymphocytic leukemia. *Cancer Cell* **26**, 813-825 (2014).
- 568
- 569 8. Li S., *et al.* Distinct evolution and dynamics of epigenetic and genetic heterogeneity in acute myeloid leukemia.  
570 *Nat Med* **22**, 792-799 (2016).
- 571
- 572 9. Sheffield N. C., *et al.* DNA methylation heterogeneity defines a disease spectrum in Ewing sarcoma. *Nat Med* **23**,  
573 386-395 (2017).
- 574
- 575 10. Pan H., *et al.* Epigenomic evolution in diffuse large B-cell lymphomas. *Nat Commun* **6**, 6921 (2015).
- 576
- 577 11. Li S., *et al.* Somatic Mutations Drive Specific, but Reversible, Epigenetic Heterogeneity States in AML. *Cancer*  
578 *Discov* **10**, 1934-1949 (2020).
- 579
- 580 12. Cancer Genome Atlas Research N., *et al.* Genomic and epigenomic landscapes of adult de novo acute myeloid  
581 leukemia. *N Engl J Med* **368**, 2059-2074 (2013).
- 582
- 583 13. Varadi M., *et al.* AlphaFold Protein Structure Database: massively expanding the structural coverage of protein-  
584 sequence space with high-accuracy models. *Nucleic Acids Res* **50**, D439-D444 (2022).
- 585
- 586 14. Holz-Schietinger C., Matje D. M., Harrison M. F., Reich N. O. Oligomerization of DNMT3A controls the  
587 mechanism of de novo DNA methylation. *J Biol Chem* **286**, 41479-41488 (2011).
- 588
- 589 15. Holz-Schietinger C., Matje D. M., Reich N. O. Mutations in DNA methyltransferase (DNMT3A) observed in  
590 acute myeloid leukemia patients disrupt processive methylation. *J Biol Chem* **287**, 30941-30951 (2012).
- 591
- 592 16. Lee D., Koo B., Yang J., Kim S. Methy: Ultrafast DNA methylation heterogeneity calculation from bisulfite  
593 read alignments. Preprint at <https://www.biorxiv.org/content/10.1101/2022.07.20.500893v1> (2022).
- 594
- 595 17. Spencer D. H., *et al.* CpG Island Hypermethylation Mediated by DNMT3A Is a Consequence of AML Progression.  
596 *Cell* **168**, 801-816 e813 (2017).
- 597
- 598 18. Juhling F., Kretzmer H., Bernhart S. H., Otto C., Stadler P. F., Hoffmann S. methylene: fast and sensitive calling of  
599 differentially methylated regions from bisulfite sequencing data. *Genome Res* **26**, 256-262 (2016).
- 600
- 601 19. Encode Project Consortium. An integrated encyclopedia of DNA elements in the human genome. *Nature* **489**, 57-  
602 74 (2012).
- 603
- 604 20. Ernst J., Kellis M. Chromatin-state discovery and genome annotation with ChromHMM. *Nat Protoc* **12**, 2478-  
605 2492 (2017).
- 606
- 607 21. Scherer M., *et al.* Quantitative comparison of within-sample heterogeneity scores for DNA methylation data.



- 608 *Nucleic Acids Res* **48**, e46 (2020).  
609
- 610 22. Landan G., *et al.* Epigenetic polymorphism and the stochastic formation of differentially methylated regions in  
611 normal and cancerous tissues. *Nature Genetics* **44**, 1207-1214 (2012).  
612
- 613 23. Bernstein B. E., *et al.* A bivalent chromatin structure marks key developmental genes in embryonic stem cells.  
614 *Cell* **125**, 315-326 (2006).  
615
- 616 24. Fleming H. E., *et al.* Wnt signaling in the niche enforces hematopoietic stem cell quiescence and is necessary to  
617 preserve self-renewal in vivo. *Cell Stem Cell* **2**, 274-283 (2008).  
618
- 619 25. Huang J., Nguyen-McCarty M., Hexner E. O., Danet-Desnoyers G., Klein P. S. Maintenance of hematopoietic  
620 stem cells through regulation of Wnt and mTOR pathways. *Nat Med* **18**, 1778-1785 (2012).  
621
- 622 26. Wainwright E. N., Scaffidi P. Epigenetics and Cancer Stem Cells: Unleashing, Hijacking, and Restricting Cellular  
623 Plasticity. *Trends Cancer* **3**, 372-386 (2017).  
624
- 625 27. Santini V., Ossenkuppele G. J. Hypomethylating agents in the treatment of acute myeloid leukemia: A guide to  
626 optimal use. *Crit Rev Oncol Hematol* **140**, 1-7 (2019).  
627
- 628 28. Kordella C., Lamprianidou E., Kotsianidis I. Mechanisms of Action of Hypomethylating Agents: Endogenous  
629 Retroelements at the Epicenter. *Front Oncol* **11**, 650473 (2021).  
630
- 631 29. Sigalotti L., *et al.* Epigenetic drugs as pleiotropic agents in cancer treatment: biomolecular aspects and clinical  
632 applications. *J Cell Physiol* **212**, 330-344 (2007).  
633
- 634 30. Agrawal K., Das V., Vyas P., Hajdusch M. Nucleosidic DNA demethylating epigenetic drugs - A comprehensive  
635 review from discovery to clinic. *Pharmacol Ther* **188**, 45-79 (2018).  
636
- 637 31. Tyner J. W., *et al.* Functional genomic landscape of acute myeloid leukaemia. *Nature* **562**, 526-531 (2018).  
638
- 639 32. Glass J. L., *et al.* Epigenetic Identity in AML Depends on Disruption of Nonpromoter Regulatory Elements and  
640 Is Affected by Antagonistic Effects of Mutations in Epigenetic Modifiers. *Cancer Discov* **7**, 868-883 (2017).  
641
- 642 33. Sandoval J. E., Huang Y. H., Muise A., Goodell M. A., Reich N. O. Mutations in the DNMT3A DNA  
643 methyltransferase in acute myeloid leukemia patients cause both loss and gain of function and differential  
644 regulation by protein partners. *J Biol Chem* **294**, 4898-4910 (2019).  
645
- 646 34. Martin M. Cutadapt removes adapter sequences from high-throughput sequencing reads. *EMBnet journal* **17**, 10-  
647 12 (2011).  
648
- 649 35. Krueger F., Andrews S. R. Bismark: a flexible aligner and methylation caller for Bisulfite-Seq applications.  
650 *Bioinformatics* **27**, 1571-1572 (2011).  
651
- 652 36. Ryan D. MethylDackel. <https://github.com/dpryan79/MethylDackel> (2022).  
653
- 654 37. Cole C. B., *et al.* Haploinsufficiency for DNA methyltransferase 3A predisposes hematopoietic cells to myeloid  
655 malignancies. *J Clin Invest* **127**, 3657-3674 (2017).  
656
- 657 38. Li H., Durbin R. Fast and accurate short read alignment with Burrows-Wheeler transform. *Bioinformatics* **25**,  
658 1754-1760 (2009).  
659
- 660 39. Kim S., *et al.* Strelka2: fast and accurate calling of germline and somatic variants. *Nat Methods* **15**, 591-594  
661 (2018).  
662
- 663 40. Koboldt D. C., *et al.* VarScan: variant detection in massively parallel sequencing of individual and pooled samples.  
664 *Bioinformatics* **25**, 2283-2285 (2009).  
665
- 666 41. Cingolani P., *et al.* A program for annotating and predicting the effects of single nucleotide polymorphisms,  
667 SnpEff: SNPs in the genome of *Drosophila melanogaster* strain w1118; iso-2; iso-3. *Fly (Austin)* **6**, 80-92 (2012).

- 668  
669 42. Cingolani P., *et al.* Using *Drosophila melanogaster* as a Model for Genotoxic Chemical Mutational Studies with  
670 a New Program, SnpSift. *Front Genet* **3**, 35 (2012).  
671
- 672 43. Cerami E., *et al.* The cBio cancer genomics portal: an open platform for exploring multidimensional cancer  
673 genomics data. *Cancer Discov* **2**, 401-404 (2012).  
674
- 675 44. Vaisvila R., *et al.* Enzymatic methyl sequencing detects DNA methylation at single-base resolution from  
676 picograms of DNA. *Genome Res* **31**, 1280-1289 (2021).  
677
- 678 45. Quinlan A. R., Hall I. M. BEDTools: a flexible suite of utilities for comparing genomic features. *Bioinformatics*  
679 **26**, 841-842 (2010).  
680
- 681 46. Frankish A., *et al.* Gencode 2021. *Nucleic Acids Res* **49**, D916-D923 (2021).  
682
- 683 47. Jeong M., *et al.* Large conserved domains of low DNA methylation maintained by Dnmt3a. *Nat Genet* **46**, 17-23  
684 (2014).  
685
- 686 48. Ghandi M., *et al.* Next-generation characterization of the Cancer Cell Line Encyclopedia. *Nature* **569**, 503-508  
687 (2019).  
688
- 689 49. Amemiya H. M., Kundaje A., Boyle A. P. The ENCODE Blacklist: Identification of Problematic Regions of the  
690 Genome. *Sci Rep* **9**, 9354 (2019).  
691
- 692 50. Rees M. G., *et al.* Correlating chemical sensitivity and basal gene expression reveals mechanism of action. *Nat*  
693 *Chem Biol* **12**, 109-116 (2016).  
694
- 695 51. Gadagkar S. R., Call G. B. Computational tools for fitting the Hill equation to dose-response curves. *J Pharmacol*  
696 *Toxicol Methods* **71**, 68-76 (2015).  
697  
698

699

## Supplementary Figures

700

### Supplementary Figure 1.

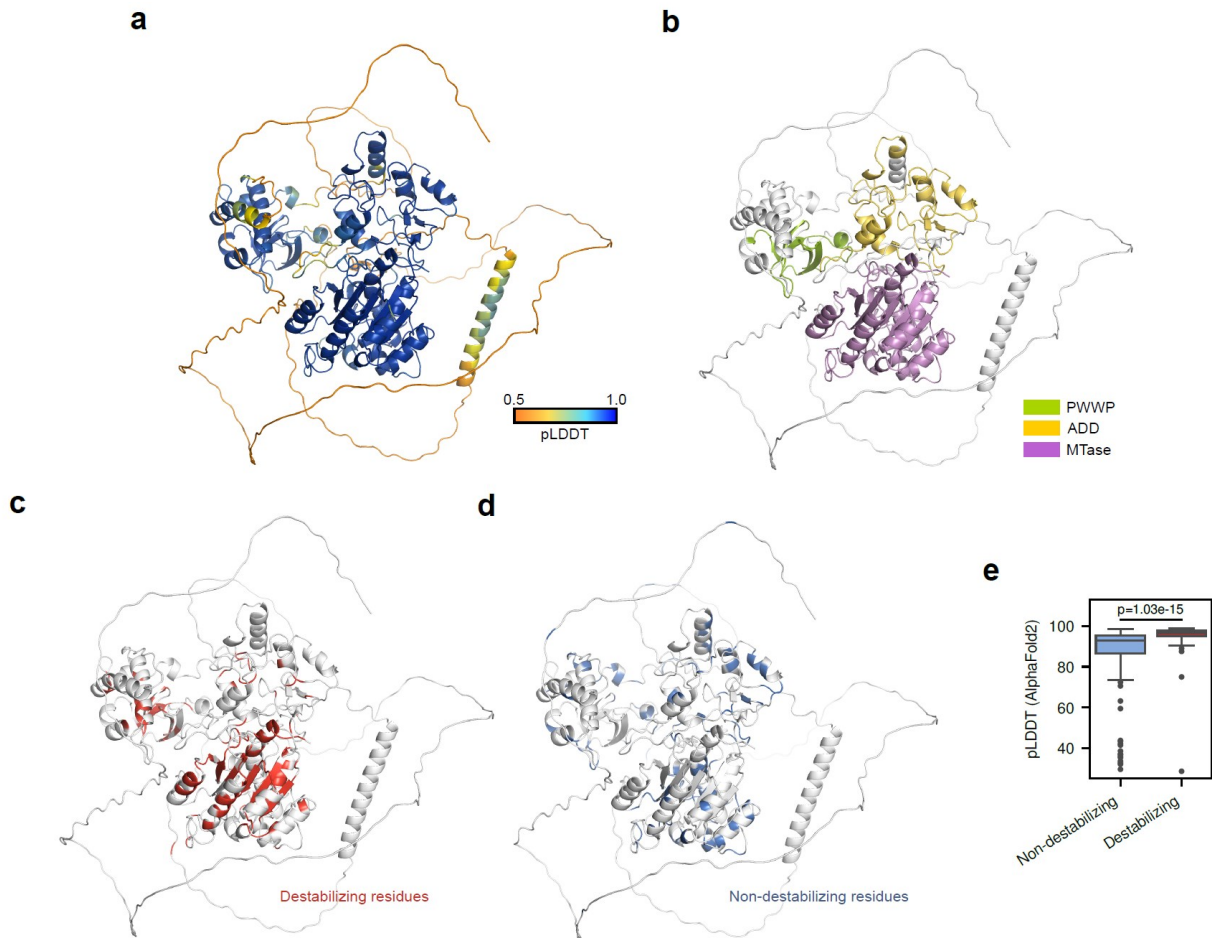

701

**Structural properties of DNMT3A amino acid residues inducing protein instability upon mutation.** Predicted structure of full-length DNMT3A was obtained from AlphaFold Protein Structure Database under Uniprot accession Q9Y6K1. (a) Residues were colored according to predicted local distance difference test (pLDDT) values produced from AlphaFold2 model. (b) Residues were colored according to the conserved domains. (c) Destabilizing residues (n=125) were colored in red. (d) Non-destabilizing residues (n=123) were colored in blue. (e) Boxplot showing the difference of pLDDT values between non-destabilizing and destabilizing residues. The center line denotes the median, the upper and lower box limits denote upper and lower quartiles, and the whiskers denote 1.5x interquartile range.

707

708

## Supplementary Figure 2.

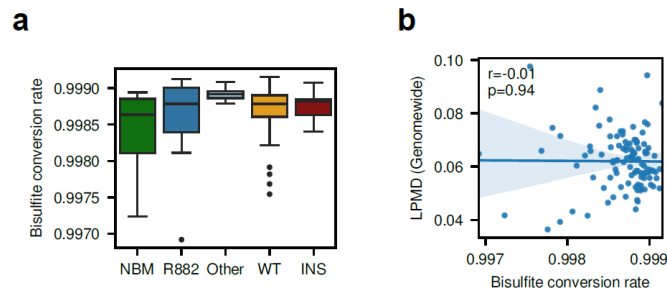

709

**Bisulfite conversion rate did not affect the observed high LPMD in *DNMT3A*<sup>INS</sup>.** (a) Boxplot showing the distribution of bisulfite conversion rate for each DNMT3A subclasses in Li2016 eRRBS data. (b) No correlation was observed between bisulfite conversion rate and genomewide LPMD values.

710

711

712

713

### Supplementary Figure 3.

a

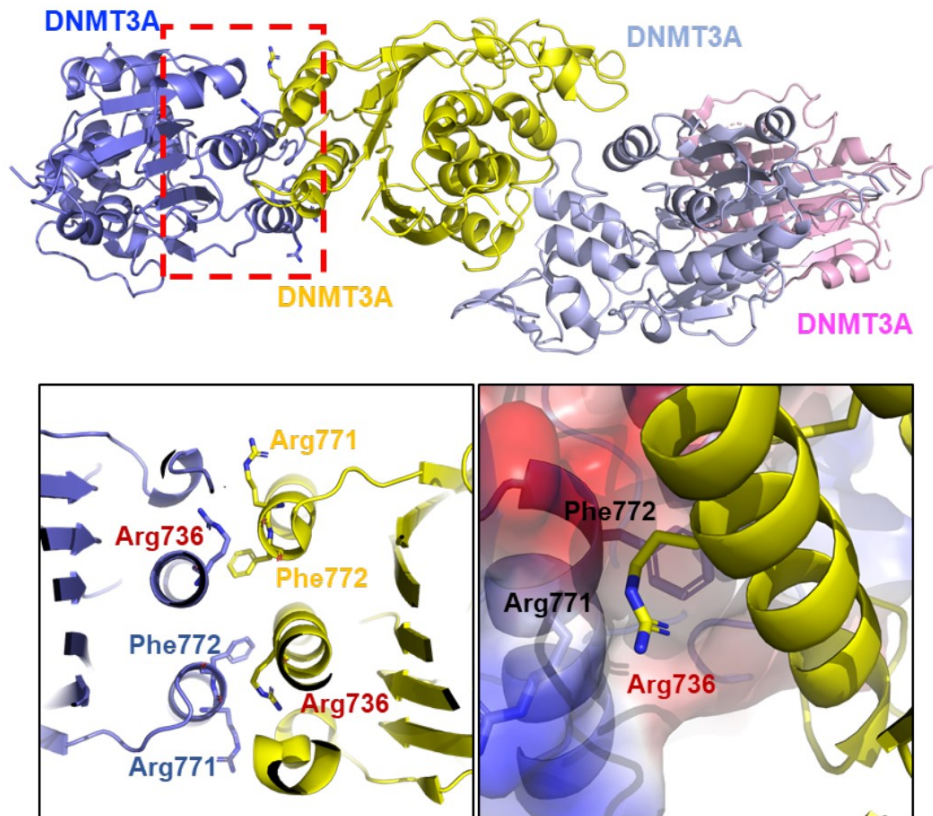

b

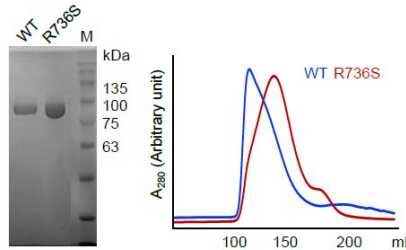

c

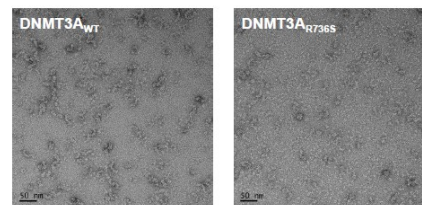

714 **R736S mutation disrupts the oligomerization of DNMT3A.** (a) DNMT3A tetramer status was modeled based on DNMT3A-DNMT3L  
715 heterotetramer (PDB ID 6BRR) by superimposing DNMT3A on DNMT3L. The location of R736S at the DNMT3A oligomer interface is  
716 indicated with a red dotted box. The detailed view of the interaction between Arg736 (R736) and the Arg771 and Phe772 from the adjacent  
717 DNMT3A molecule (left panel). The hydrocarbon region in the Arg771 side chain and the phenyl ring in Phe772 form a hydrophobic patch  
718 where the hydrocarbon region of Arg736 interacts. The adjacent DNMT3A molecule is shown in electrostatic surface representation,  
719 showing the hydrophobic interaction among Arg736, Arg771 and Phe772. The mutation of Arg736 would interfere this interaction. (b) An  
720 SDS-PAGE gel shows the purified DNMT3A<sup>WT</sup> and DNMT3A<sup>R736S</sup>. A gel-filtration chromatograms of DNMT3A<sup>WT</sup> (WT) and DNMT3A<sup>R736S</sup>  
721 (R736S) shows that R736S disrupts the oligomerization states. (c) Negative-stain EM analysis of DNMT3A<sup>WT</sup> and DNMT3A<sup>R736S</sup>.  
722 DNMT3A<sup>R736S</sup> exhibits smaller particles than DNMT3A<sup>WT</sup>.  
723

724

## Supplementary Figure 4.

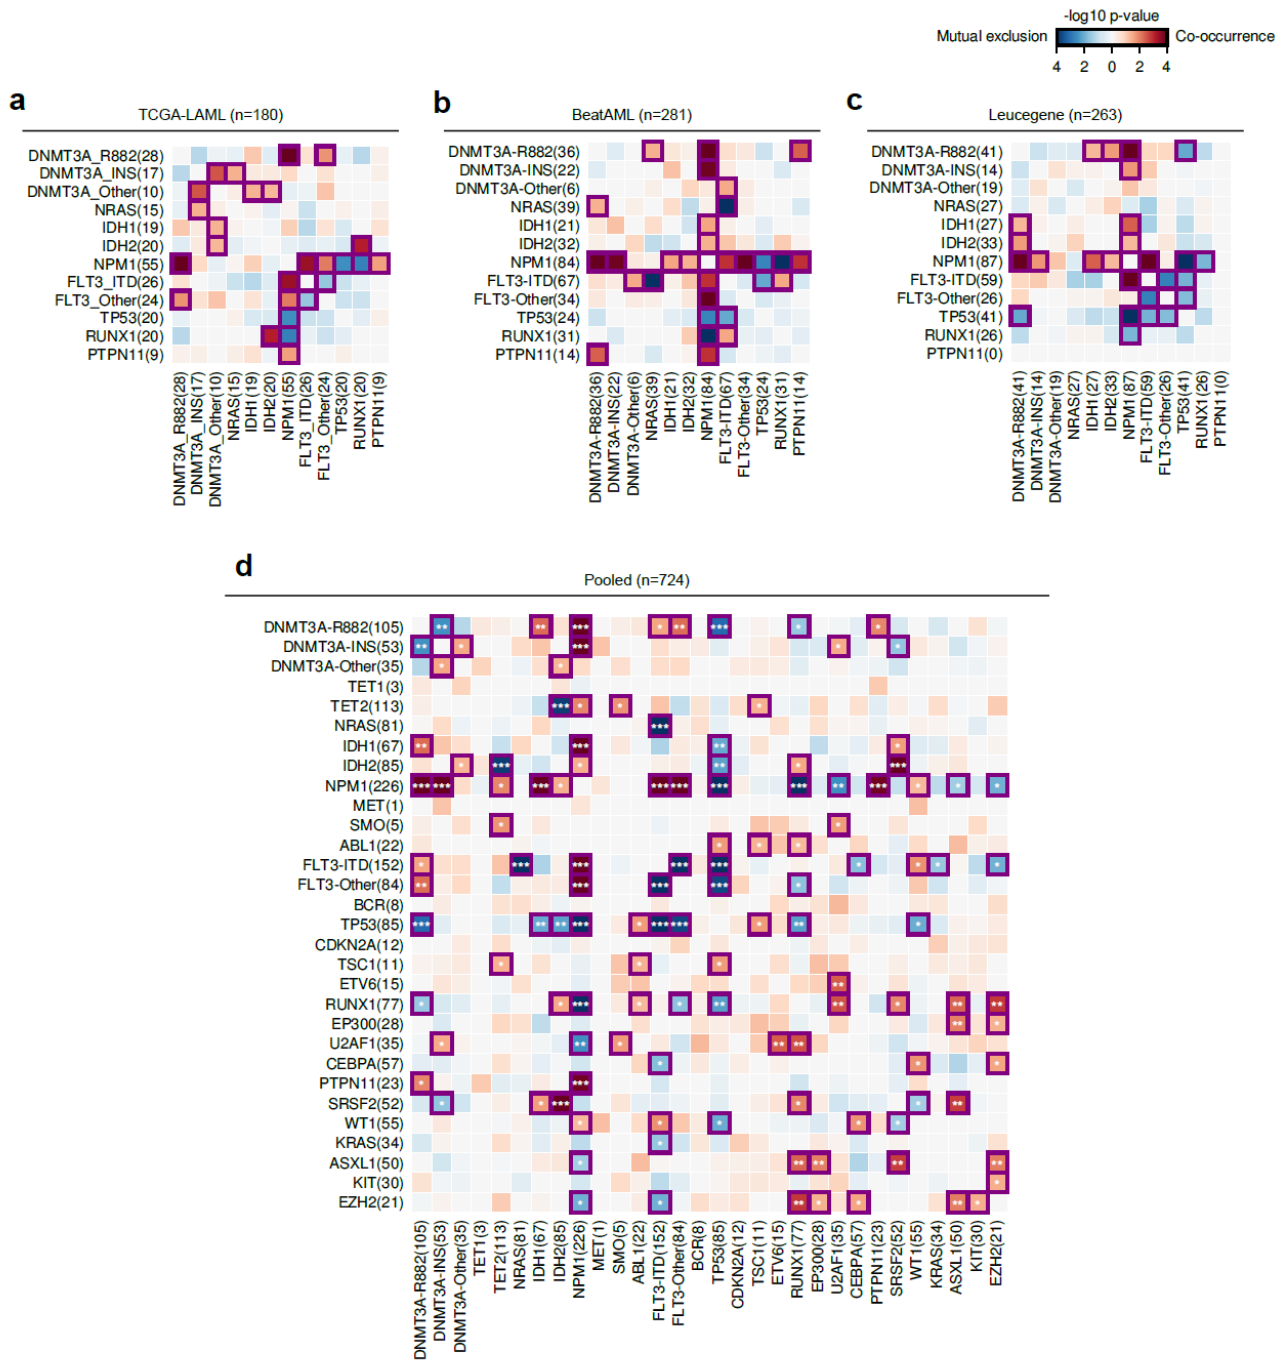

725

**Mutational co-occurrence analysis.** Heatmaps show the significance of the co-occurrence (red) and mutual exclusion (blue) of a pair of mutations for (a) TCGA-LAML, (b) BeatAML and (c) Leucegene cohorts. Colors denote unadjusted p-values from Fisher's exact test. Gene pairs with  $p < 0.05$  were indicated with purple squares. FLT3-ITD, FLT3 with internal tandem duplication; FLT3-Other, FLT3 with mutations other than FLT3-ITD.

726

727

728

729

730

## Supplementary Figure 5.

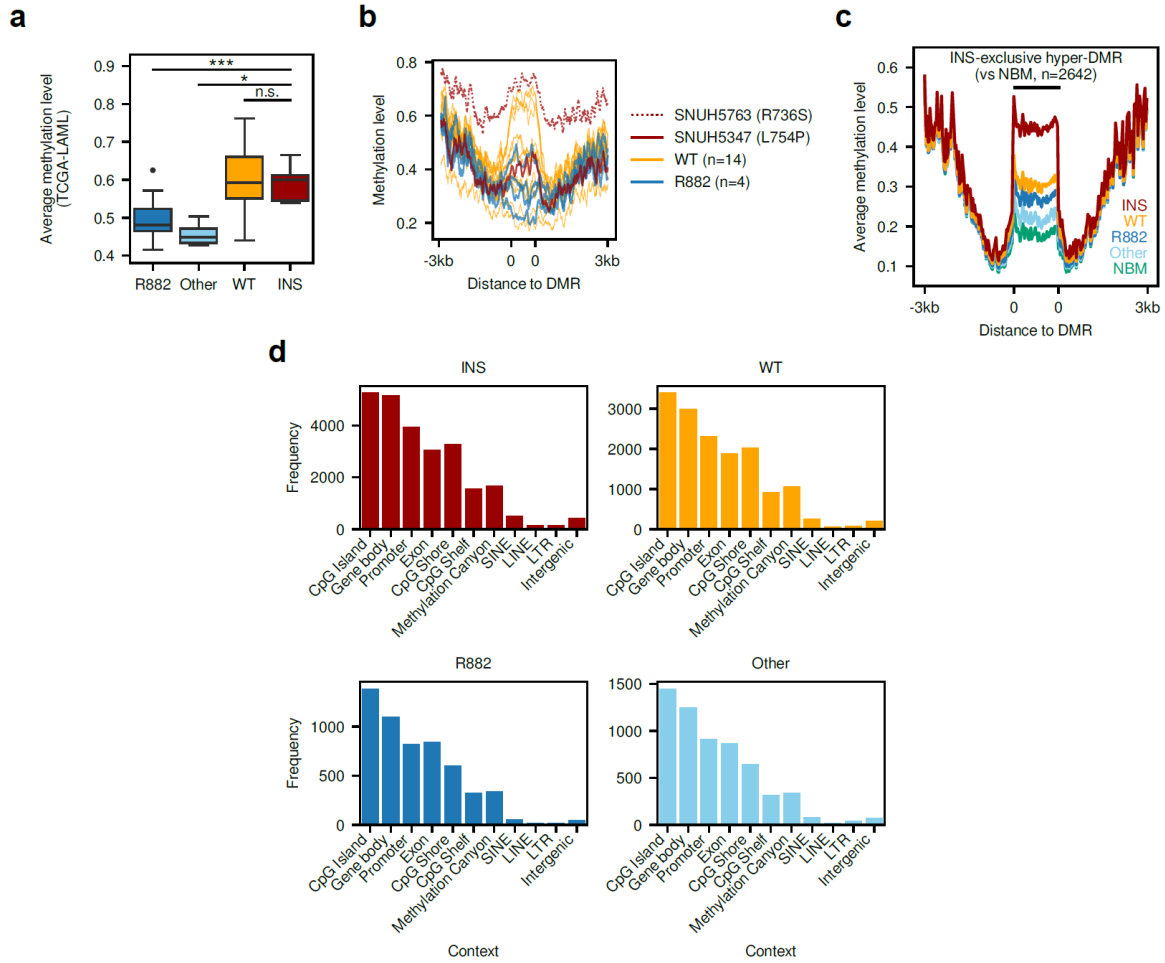

731 **Differentially methylated region (DMR) analysis.** (a) Average methylation levels of TCGA-LAML cohort samples within hypo-DMRs in  
 732 *DNMT3A*<sup>R882</sup> (vs *DNMT3A*<sup>WT</sup>) defined in Li2016 cohort. (b) Methylation levels of SNUH cohort samples surrounding hypo-DMRs in  
 733 *DNMT3A*<sup>R882</sup> (vs *DNMT3A*<sup>WT</sup>) defined in Li2016 cohort. (c) Average methylation levels of Li2016 cohort samples surrounding hyper-DMRs  
 734 in *DNMT3A*<sup>INS</sup> (vs normal bone marrow cells). (d) Frequencies of genomic contexts covered by hyper-DMRs (vs normal bone marrow cells)  
 735 for each *DNMT3A* subclasses in Li2016 cohort. NBM, normal bone marrow.

736

737

## Supplementary Figure 6.

**a**

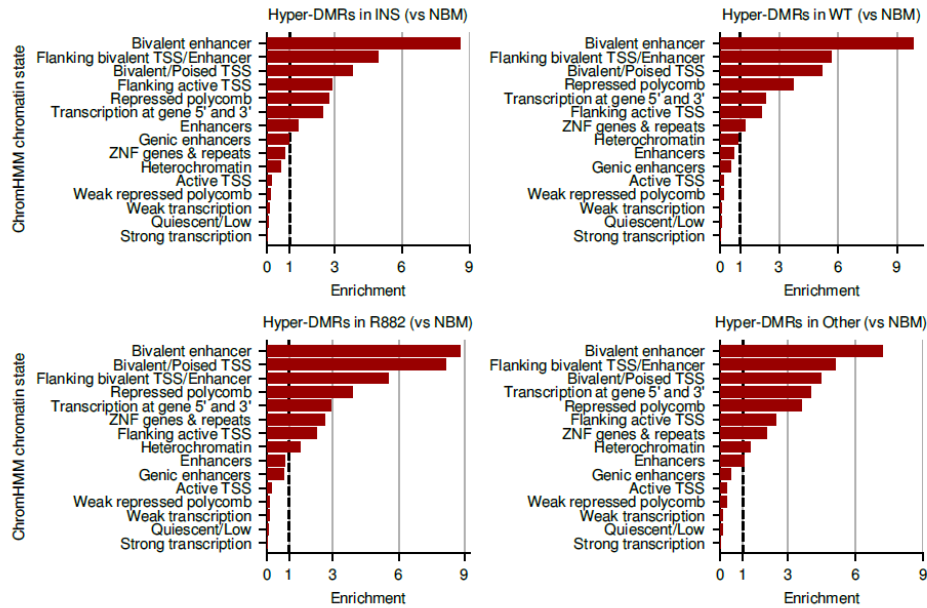

**b**

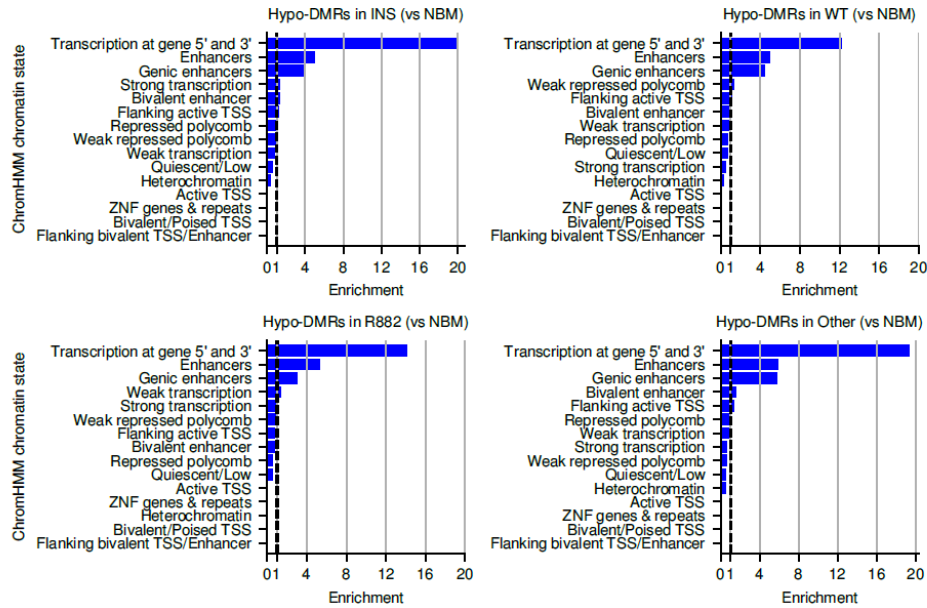

738

**Testing enrichment of differentially methylated regions for chromatin contexts.** (a) Fold enrichment of the occurrence of hyper-DMRs (vs normal bone marrow cells) for each chromHMM chromatin state. Fold enrichment was computed by taking the ratio between the length of the observed and expected intersection between DMRs and each chromatin state. (b) Fold enrichment of the occurrence of hypo-DMRs (vs normal bone marrow cells) for each chromHMM chromatin state.

739

740

741

742



743

## Supplementary Figure 7.

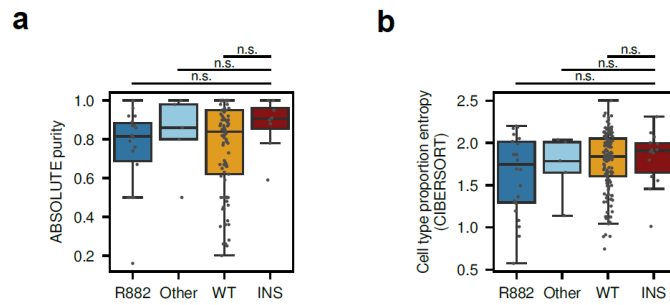

744 **Purity and cell type composition analysis.** (a) Sample purity distribution across DNMT3A subclasses in Li2016 cohort. Purities were  
745 computed using ABSOLUTE. (b) Distribution of the entropy of cell type proportion across DNMT3A subclasses in Li2016 cohort. Cell type  
746 proportions were computed using CIBERSORT. The center line denotes the median, the upper and lower box limits denote upper and lower  
747 quartiles, and the whiskers denote 1.5× interquartile range.  
748

749

## Supplementary Figure 8.

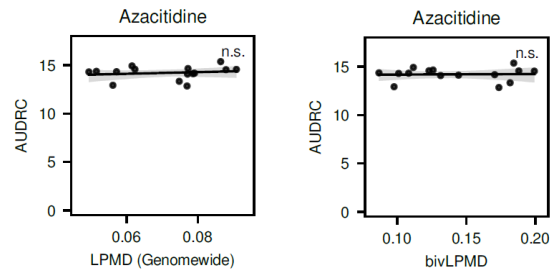

750

**Responses of AML cell lines to azacitidine.** Association between genomewide (left) or bivalent-domain-specific LPMD (bivLPMD; right) and area under dose response curve (AUDRC) are shown. No significant correlation was observed (n.s.).

751

752

753

## Supplementary Figure 9.

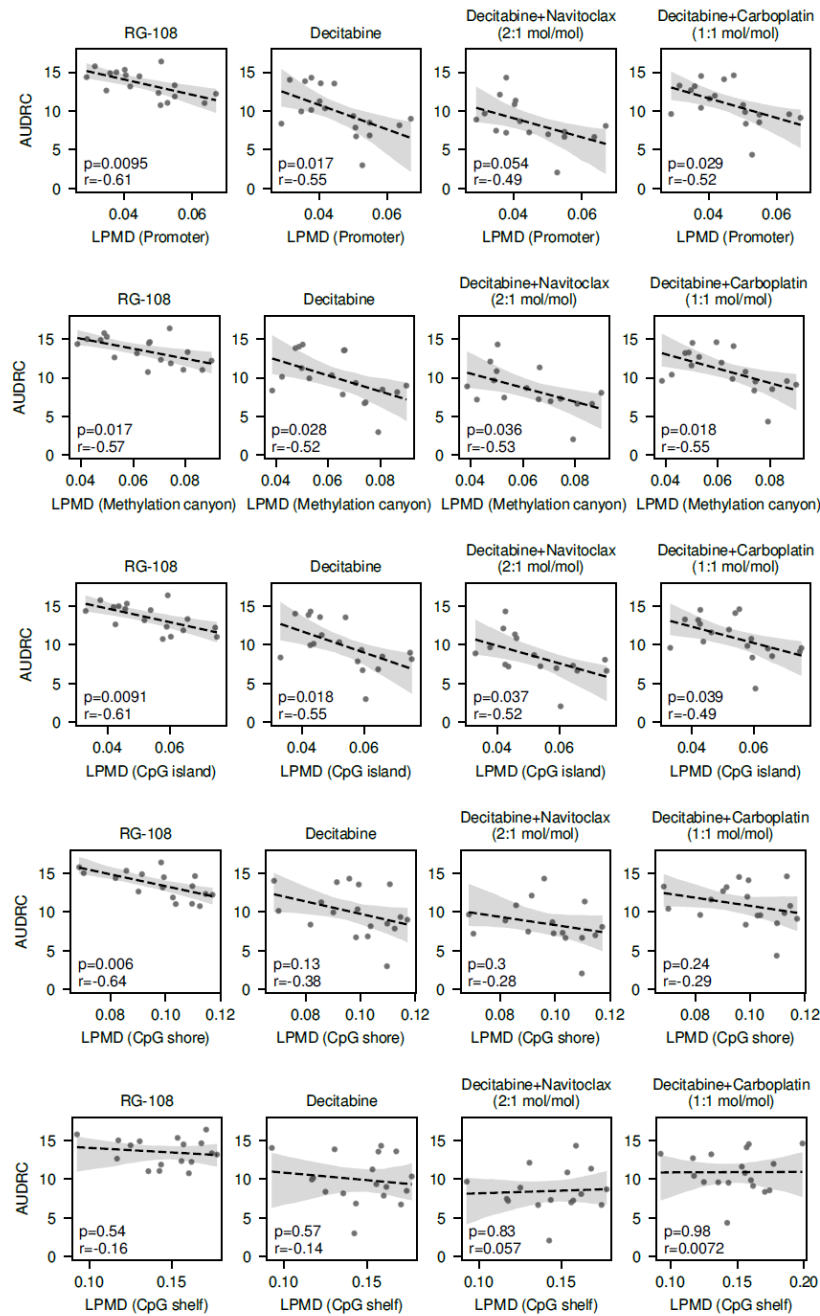

754

**Association between regulatory region-specific LPMD and response to hypomethylating agent.** Association between LPMD values within promoters, methylation canyons, CpG islands, CpG shores and CpG shelves and AUDRC for hypomethylating agent treatment are shown. Pearson's correlation coefficient and corresponding p-values are shown.

755

756

757

758

## Supplementary Figure 10.

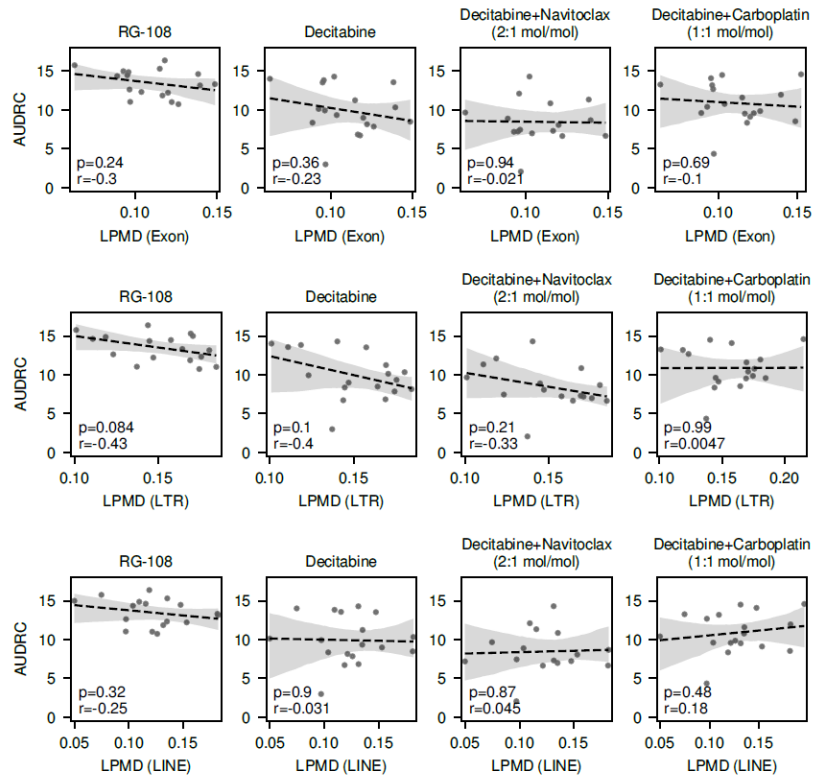

759

**Association between non-regulatory region-specific LPMD and response to hypomethylating agent.** Association between LPMD values within exons, LTRs and LINEs and AUDRC for hypomethylating agent treatment are shown. Pearson's correlation coefficient and corresponding p-values are shown.

760

761

762

763 **Supplementary Figure 11.**

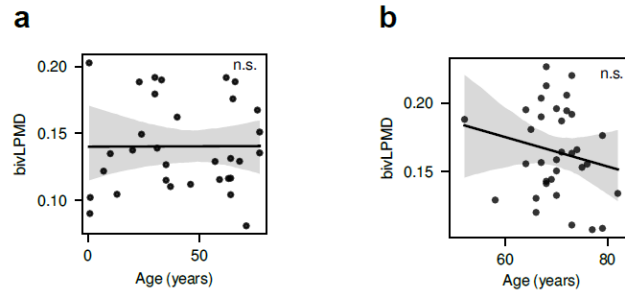

764 **LPMD at bivalent domains are not associated with age.** (a) Relationship between cell line age at sampling and bivLPMD values in CCLE  
765 AML cell lines. No significant correlation was observed (n.s.). (b) Relationship between patient ages and bivLPMD values in our own cohort  
766 for retrospective HMA response analysis (see Figure 5f, g). No significant correlation was observed (n.s.).  
767

768

## Supplementary Figure 12.

a

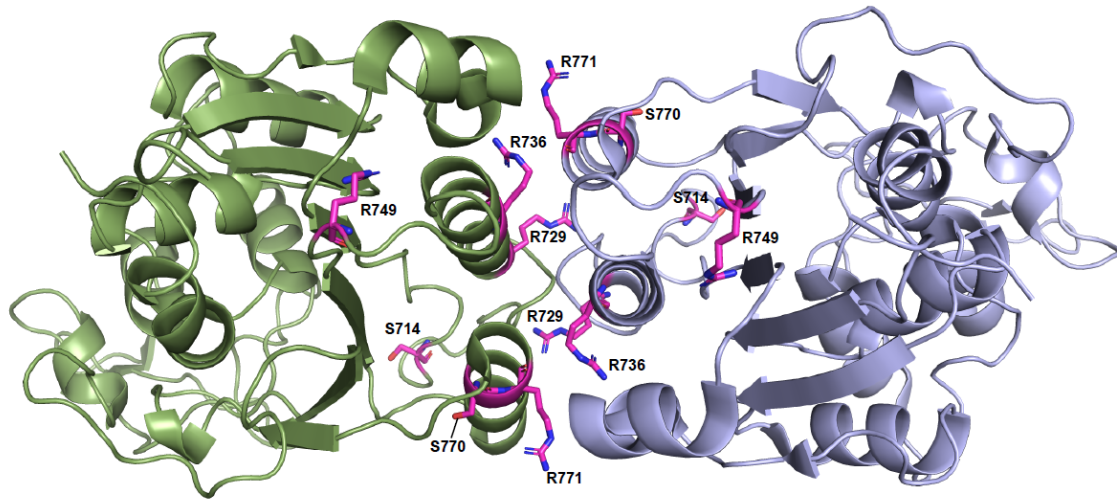

b

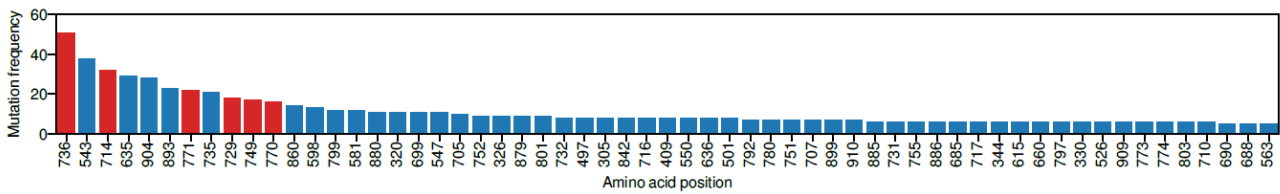

769

**Prevalence of non-R882 mutations that may contribute to dimeric preference of DNMT3A through weakening interactions in tetramer interface.** (a) Structure of DNMT3A tetramer interface. Destabilizing residues (stability score < 0.75) that are in the vicinity of the tetramer interface are highlighted. DNMT3A tetramer status was modeled based on DNMT3A-DMNT3L heterotetramer (PDB ID 6BRR) by superimposing DNMT3A on DMNT3L. (b) Top 60 DNMT3A residues that are most frequently mutated in hematological malignancies are shown. Data was downloaded from COSMIC. Frequency for R882 (n=1748) was not shown for the visibility. Red bars denote the destabilizing amino acid residues that are placed in the vicinity of tetramer interface of DNMT3A.

775

776

## Supplementary Tables

777

**Supplementary Table 1. Destabilizing and non-stabilizing residues.** Position refers to the 1-based position of an amino acid residue.

| <b>Position</b> | <b>Stability ratio (normalized to WT)</b> | <b>Destabilizing</b> |
|-----------------|-------------------------------------------|----------------------|
| 12              | 0.8555979                                 | No                   |
| 30              | 0.8360113                                 | No                   |
| 90              | 1.084197                                  | No                   |
| 181             | 1.044739                                  | No                   |
| 183             | 1.060101                                  | No                   |
| 192             | 1.047929                                  | No                   |
| 254             | 0.4813288                                 | Yes                  |
| 267             | 1.016953                                  | No                   |
| 272             | 1.022709                                  | No                   |
| 281             | 1.017266                                  | No                   |
| 288             | 1.017836                                  | No                   |
| 290             | 0.4599451                                 | Yes                  |
| 292             | 1.014288                                  | No                   |
| 293             | 0.3443498                                 | Yes                  |
| 295             | 0.3435179                                 | Yes                  |
| 297             | 0.1578041                                 | Yes                  |
| 298             | 0.3447503                                 | Yes                  |
| 299             | 1.024477                                  | No                   |
| 301             | 1.012748                                  | No                   |
| 302             | 1.032172                                  | No                   |
| 304             | 0.9931188                                 | No                   |
| 307             | 0.1565844                                 | Yes                  |
| 308             | 0.342584                                  | Yes                  |
| 309             | 0.5492893                                 | Yes                  |
| 310             | 0.1712749                                 | Yes                  |
| 312             | 0.6274686                                 | Yes                  |
| 314             | 1.072061                                  | No                   |
| 316             | 1.071478                                  | No                   |
| 318             | 0.9328556                                 | No                   |
| 322             | 1.053182                                  | No                   |
| 324             | 0.4608576                                 | Yes                  |
| 326             | 0.252030067                               | Yes                  |
| 328             | 0.2114281                                 | Yes                  |
| 332             | 0.373928                                  | Yes                  |
| 337             | 0.3451776                                 | Yes                  |
| 339             | 0.1308347                                 | Yes                  |
| 342             | 0.8949588                                 | No                   |
| 344             | 0.1882434                                 | Yes                  |

|     |            |     |
|-----|------------|-----|
| 352 | 0.966761   | No  |
| 359 | 0.5646341  | Yes |
| 361 | 0.8742617  | No  |
| 365 | 0.1697705  | Yes |
| 366 | 0.65244465 | Yes |
| 368 | 0.3986021  | Yes |
| 369 | 0.3906805  | Yes |
| 376 | 0.3382373  | Yes |
| 378 | 1.0956     | No  |
| 379 | 0.916074   | No  |
| 380 | 0.9477463  | No  |
| 385 | 1.072299   | No  |
| 400 | 1.15719    | No  |
| 407 | 0.6492172  | Yes |
| 410 | 0.2881317  | Yes |
| 413 | 0.8793166  | No  |
| 414 | 0.2475144  | Yes |
| 419 | 0.9446362  | No  |
| 424 | 0.9331912  | No  |
| 426 | 0.9512829  | No  |
| 428 | 0.973034   | No  |
| 431 | 0.9554172  | No  |
| 436 | 0.9696032  | No  |
| 437 | 1.043213   | No  |
| 438 | 1.000848   | No  |
| 455 | 1.150239   | No  |
| 458 | 1.0636     | No  |
| 474 | 1.130067   | No  |
| 477 | 1.098108   | No  |
| 478 | 1.088251   | No  |
| 484 | 1.138854   | No  |
| 494 | 0.4751771  | Yes |
| 495 | 0.9011877  | No  |
| 497 | 0.2767733  | Yes |
| 507 | 0.5604438  | Yes |
| 508 | 0.5859341  | Yes |
| 511 | 0.5064597  | Yes |
| 514 | 0.5244856  | Yes |
| 517 | 0.5214359  | Yes |
| 518 | 1.109377   | No  |
| 525 | 0.8306941  | No  |
| 527 | 0.8820262  | No  |



|     |           |     |
|-----|-----------|-----|
| 529 | 0.8778251 | No  |
| 531 | 1.107685  | No  |
| 532 | 0.7987965 | No  |
| 533 | 0.8857338 | No  |
| 537 | 0.4448991 | Yes |
| 543 | 0.9069754 | No  |
| 545 | 1.100344  | No  |
| 547 | 0.9057181 | No  |
| 548 | 0.8853955 | No  |
| 549 | 0.2513217 | Yes |
| 550 | 0.848029  | No  |
| 554 | 0.579103  | Yes |
| 556 | 1.040666  | No  |
| 562 | 0.4254519 | Yes |
| 563 | 0.8841944 | No  |
| 567 | 0.8097687 | No  |
| 571 | 1.04459   | No  |
| 572 | 1.0849    | No  |
| 573 | 1.00304   | No  |
| 575 | 1.062243  | No  |
| 579 | 1.09785   | No  |
| 580 | 1.087125  | No  |
| 581 | 0.767763  | No  |
| 583 | 0.4330766 | Yes |
| 586 | 0.4554169 | Yes |
| 596 | 1.063925  | No  |
| 598 | 0.7779466 | No  |
| 604 | 0.8633119 | No  |
| 623 | 0.7358614 | Yes |
| 627 | 0.8867821 | No  |
| 631 | 0.4886155 | Yes |
| 635 | 0.40598   | Yes |
| 636 | 0.3582201 | Yes |
| 637 | 0.2517871 | Yes |
| 638 | 0.4007301 | Yes |
| 639 | 0.3937565 | Yes |
| 641 | 0.7750524 | No  |
| 642 | 0.6365951 | Yes |
| 645 | 0.856708  | No  |
| 646 | 0.4442819 | Yes |
| 647 | 0.4245519 | Yes |
| 648 | 0.3928059 | Yes |

|     |           |     |
|-----|-----------|-----|
| 649 | 0.5172071 | Yes |
| 650 | 0.4159871 | Yes |
| 653 | 0.3714397 | Yes |
| 657 | 0.4237124 | Yes |
| 659 | 0.7358019 | Yes |
| 660 | 0.3594055 | Yes |
| 661 | 0.4046589 | Yes |
| 662 | 0.4288399 | Yes |
| 663 | 0.4802697 | Yes |
| 665 | 1.060347  | No  |
| 668 | 0.8538262 | No  |
| 669 | 0.7318646 | Yes |
| 672 | 0.8466228 | No  |
| 675 | 0.9984979 | No  |
| 676 | 0.5809479 | Yes |
| 677 | 0.8412493 | No  |
| 684 | 0.3898449 | Yes |
| 685 | 0.4403994 | Yes |
| 686 | 0.3386339 | Yes |
| 687 | 0.4086413 | Yes |
| 688 | 0.8012436 | No  |
| 690 | 0.3550435 | Yes |
| 691 | 0.4553243 | Yes |
| 695 | 0.9120905 | No  |
| 699 | 0.3200215 | Yes |
| 700 | 0.3495642 | Yes |
| 701 | 0.4556982 | Yes |
| 702 | 0.3932404 | Yes |
| 703 | 0.4818903 | Yes |
| 704 | 0.6508228 | Yes |
| 705 | 0.3875358 | Yes |
| 706 | 0.387481  | Yes |
| 707 | 0.3802217 | Yes |
| 709 | 0.8902627 | No  |
| 710 | 0.9437781 | No  |
| 714 | 0.6880003 | Yes |
| 716 | 1.033337  | No  |
| 717 | 0.9261547 | No  |
| 718 | 0.7192777 | Yes |
| 720 | 1.061631  | No  |
| 728 | 0.8359543 | No  |
| 729 | 0.363541  | Yes |

|     |            |     |
|-----|------------|-----|
| 731 | 0.40776975 | Yes |
| 733 | 0.426707   | Yes |
| 734 | 0.3905955  | Yes |
| 735 | 0.8630975  | No  |
| 736 | 0.3158816  | Yes |
| 737 | 0.4684402  | Yes |
| 741 | 0.6665348  | Yes |
| 742 | 0.3868087  | Yes |
| 743 | 0.4593113  | Yes |
| 747 | 0.7108312  | Yes |
| 749 | 0.3392981  | Yes |
| 751 | 0.3471555  | Yes |
| 752 | 0.3410564  | Yes |
| 754 | 0.3862334  | Yes |
| 755 | 0.4103273  | Yes |
| 756 | 0.9537112  | No  |
| 758 | 0.8622715  | No  |
| 759 | 0.96031345 | No  |
| 761 | 0.9529492  | No  |
| 768 | 0.636552   | Yes |
| 769 | 0.4562491  | Yes |
| 770 | 0.4189152  | Yes |
| 771 | 0.5270026  | Yes |
| 772 | 0.7405099  | Yes |
| 774 | 0.2667145  | Yes |
| 777 | 0.4505224  | Yes |
| 778 | 0.3130035  | Yes |
| 780 | 0.4925803  | Yes |
| 781 | 0.9319379  | No  |
| 783 | 1.10281    | No  |
| 789 | 1.081251   | No  |
| 792 | 0.9790729  | No  |
| 793 | 0.4067298  | Yes |
| 794 | 0.6260574  | Yes |
| 795 | 0.3420015  | Yes |
| 796 | 0.5078561  | Yes |
| 797 | 0.4046881  | Yes |
| 798 | 0.40725    | Yes |
| 799 | 0.325236   | Yes |
| 800 | 0.9266615  | No  |
| 801 | 0.4246202  | Yes |
| 803 | 0.9229618  | No  |

|     |            |     |
|-----|------------|-----|
| 804 | 1.028859   | No  |
| 811 | 0.9130292  | No  |
| 813 | 1.025642   | No  |
| 814 | 1.049149   | No  |
| 815 | 0.9383628  | No  |
| 822 | 1.007593   | No  |
| 825 | 0.9238034  | No  |
| 826 | 1.062891   | No  |
| 828 | 1.062804   | No  |
| 829 | 0.9500532  | No  |
| 835 | 0.9569821  | No  |
| 836 | 0.9760696  | No  |
| 838 | 0.9859692  | No  |
| 849 | 0.5965496  | Yes |
| 850 | 1.02501    | No  |
| 857 | 0.937554   | No  |
| 860 | 0.9209173  | No  |
| 865 | 0.5922805  | Yes |
| 868 | 0.9252796  | No  |
| 869 | 0.5570258  | Yes |
| 872 | 1.025123   | No  |
| 873 | 1.041027   | No  |
| 879 | 0.8984118  | No  |
| 880 | 0.9616624  | No  |
| 881 | 0.6161368  | Yes |
| 882 | 0.9764945  | No  |
| 884 | 1.002667   | No  |
| 886 | 1.072883   | No  |
| 893 | 0.9518706  | No  |
| 896 | 0.8088213  | No  |
| 898 | 0.7921419  | No  |
| 899 | 0.8239997  | No  |
| 901 | 0.4658968  | Yes |
| 902 | 0.36474025 | Yes |
| 904 | 0.2603852  | Yes |
| 905 | 0.4671688  | Yes |
| 906 | 0.6004309  | Yes |
| 907 | 0.3925456  | Yes |
| 908 | 0.4078807  | Yes |
| 909 | 0.327513   | Yes |
| 910 | 0.5581608  | Yes |
| 911 | 0.5075343  | Yes |

778

779

780

**Supplementary Table 2. Characteristics of SNUH AML patients for bisulfite sequencing analysis.**

| Sample   | Age (yr) | Sex | Karyotype                                                                                                     |
|----------|----------|-----|---------------------------------------------------------------------------------------------------------------|
| SNUH4794 | 46       | F   | 46,XX,t(8;21)(q22;q22)[20]                                                                                    |
| SNUH5053 | 48       | M   | 45,X,-Y,t(8;21)(q22;q22)[20]                                                                                  |
| SNUH5070 | 51       | F   | 46,XX[20]                                                                                                     |
| SNUH5160 | 41       | M   | 46,XY[20]                                                                                                     |
| SNUH5174 | 56       | F   | Unknown                                                                                                       |
| SNUH5196 | 64       | F   | 46,XX,del(13)(q12q14)[16]/46,XX[5]                                                                            |
| SNUH5323 | 43       | M   | 46,XY[20]                                                                                                     |
| SNUH5347 | 64       | M   | 44,XY,-3,add(5)(q?15),der(7)t(7;12)(p13;q13)add(7)(q22),+8,-10,-12,add(17)(q21)[17]/88,slx2[1]/46,XY[2]       |
| SNUH5553 | 68       | M   | 46,XY,der(7)t(7;14)(q22;q24),add(18)(q21.1)[21]                                                               |
| SNUH5576 | 77       | F   | 47,XX,+4[20]                                                                                                  |
| SNUH5696 | 66       | M   | 46,XY[21]                                                                                                     |
| SNUH5763 | 71       | M   | 47,XY,+10[4]/46,XY[17]                                                                                        |
| SNUH6002 | 54       | F   | 46,X,t(8;21)(q22;q22)[18]/46,XX[2]                                                                            |
| SNUH6076 | 79       | F   | 46,XX[11]                                                                                                     |
| SNUH6407 | 65       | F   | 46,XX,t(8;21)(q22;q22)[17]/46,XX[4]                                                                           |
| SNUH4939 | 68       | F   | 46,XX[20]                                                                                                     |
| SNUH5253 | 61       | F   | 46,XX[20]                                                                                                     |
| SNUH5996 | 61       | M   | 46,XY[20]                                                                                                     |
| SNUH5997 | 47       | M   | 44,XY,der(3;5)(q10;p10),add(7)(p22),-8,-9,add(17)(p13),+r,~100dmin[19]/88,idemx2[1].nuc ish(MYC amp)[192/200] |
| SNUH6446 | 55       | F   | 46,XX,add(12)(q12)[12]/46,idem,add(7)(p22)[2]/46,XX[6]                                                        |

781

782

**Supplementary Table 3. Characteristics of patients with hematological disorders for HMA response analysis.**

| <b>Sample</b> | <b>Age (yr)</b> | <b>Sex</b> | <b>Disease classification</b>    |
|---------------|-----------------|------------|----------------------------------|
| SNUH2715      | 68              | F          | Acute Myeloid Leukemia           |
| SNUH2789      | 79              | F          | Acute Myeloid Leukemia           |
| SNUH2996      | 68              | M          | Acute Myeloid Leukemia           |
| SNUH3173      | 73              | M          | Acute Myeloid Leukemia           |
| SNUH3190      | 77              | F          | Acute Myeloid Leukemia           |
| SNUH3313      | 67              | F          | Acute Myeloid Leukemia           |
| SNUH3626      | 73              | M          | Acute Myeloid Leukemia           |
| SNUH3651      | 70              | M          | Acute Myeloid Leukemia           |
| SNUH4028      | 73              | M          | Acute Myeloid Leukemia           |
| SNUH4390      | 82              | M          | Acute Myeloid Leukemia           |
| SNUH4590      | 74              | F          | Acute Myeloid Leukemia           |
| SNUH4819      | 70              | F          | Acute Myeloid Leukemia           |
| SNUH4871      | 72              | M          | Acute Myeloid Leukemia           |
| SNUH4995      | 70              | F          | Acute Myeloid Leukemia           |
| SNUH5018      | 68              | M          | Acute Myeloid Leukemia           |
| SNUH5137      | 64              | M          | Acute Myeloid Leukemia           |
| SNUH5167      | 68              | M          | Acute Myeloid Leukemia           |
| SNUH5189      | 66              | M          | Acute Myeloid Leukemia           |
| SNUH5199      | 76              | F          | Acute Myeloid Leukemia           |
| SNUH7090      | 75              | F          | Acute Myeloid Leukemia           |
| SNUH7098      | 58              | F          | Myelodysplastic Syndrome (RAEB)  |
| SNUH7103      | 71              | F          | Acute Myeloid Leukemia           |
| SNUH7196      | 67              | M          | Acute Myeloid Leukemia           |
| SNUH7247      | 66              | F          | Myelodysplastic Syndrome (t-MDS) |
| SNUH7349      | 70              | M          | Acute Myeloid Leukemia           |
| SNUH7366      | 73              | M          | Acute Myeloid Leukemia           |
| SNUH7383      | 67              | F          | Myelodysplastic Syndrome (t-MDS) |
| SNUH7509      | 69              | M          | Acute Myeloid Leukemia           |
| SNUH7549      | 52              | F          | Myelodysplastic Syndrome (RAEB)  |
| SNUH7666      | 71              | M          | Myelodysplastic Syndrome (RAEB)  |

|          |    |   |                                 |
|----------|----|---|---------------------------------|
| SNUH7683 | 72 | M | Acute Myeloid Leukemia          |
| SNUH7692 | 65 | M | Myelodysplastic Syndrome (RAEB) |
| SNUH7720 | 64 | M | Myelodysplastic Syndrome (RAEB) |
| SNUH7783 | 79 | M | Acute Myeloid Leukemia          |
